# Supplementary material for: A new taxonomy was developed for overlap across ‘Overviews of systematic reviews’: a meta-research study of research waste
Source: Research Square preprint supplement (doi:10.21203/rs.3.rs-665009/v4), 2021-12-13
Supplement: Supplementary file 1 [file 2105585667a2e415d034eff9.xlsx]

## Sheet: README
Excel Tab	Column title	Description	Tables or figures in the manuscript
Overlapping overviews (corresponds to the data in Table 2: Overviews with overlapping patient(s), intervention(s) and/or outcome(s) (n=173))	WHO ICD-10 Medical Classifications	WHO ICD-10 Medical Classifications for the sub-class of the overlapping overviews	Table 1 and Figure 2
	Sub-class	Sub-class of the WHO ICD-10 Medical Classifications used to group overlapping overviews	Table 2
	# overviews that duplicate	Number of overviews that overlap based on sub-class
	Overlapping overview titles	Titles of the overlapping overviews
	Date of publication	Date of publication of the overlapping overview
	Broad or narrow scope	Overview with a broad or narrow scope
	Population	Overview population eligibility criteria
	Intervention(s) with defintion	Overview intervention(s) eligibility criteria
	Outcomes	Overview outcomes eligibility criteria
	Updated Overview?	Was this overview an update of a previous overview?
Authors Duplicate	Sub-class	Sub-class of the WHO ICD-10 Medical Classifications used to group overlapping overviews
	# overviews that duplicate	Number of overviews that overlap based on sub-class
	Overlapping overview titles	Titles of the overlapping overviews
	Date of publication	Date of publication of the overlapping overview
	Authors	Overview outcomes eligibility criteria
	Same author(s)	Were the authors of the overvlapping overviews the same?
ICD-10 Med Classifications	Lists all 22 ICD-10 Med Classifications	Lists all ICD-10 Med Classifications

## Sheet: Overlapping overviews
WHO ICD-10 Medical Classifications	Sub-class	# overviews that duplicate	Overlapping overview titles	Date of publication	Broad or narrow scope	Population	Intervention(s) with defintion	Outcomes	Authors	Same author(s)	Updated Overview?	Broad overview subclassification	True duplication?	Notes
Certain conditions originating in the perinatal period	Periodontal treatment and preterm birth rate	2	Effect of periodontal treatment on preterm birth rate: a systematic review of meta‐analyses.	2015	Narrow	Pregnant women	Maternal periodontal treatment	Preterm birth	López NJ, Uribe S, Martinez B.	No	No		No	Uses the single outcome of preterm birth whereas study below contains more
Certain conditions originating in the perinatal period	Periodontal treatment and preterm birth rate		Gaps in knowledge about the association between maternal periodontitis and adverse obstetric outcomes: an umbrella review.	2017	Narrow	Pregnant women	Maternal periodontal treatment	Birth weight, preterm birth, preeclampsia	Vivares-Builes AM, Rangel-Rincón LJ, Botero JE, Agudelo-Suárez AA.	No	No		No
Certain conditions originating in the perinatal period	Preterm birth	3	The effectiveness of medical interventions aimed at preventing preterm birth: A literature review.	2011	Broad	Pregnant women	Midwife-led, woman-centred, group-based, interactive antenatal models of care/ education, and medical interventions (anti-infective medications, tocolytics, progesterone and cervical cerclage)	Preterm birth	Wisanskoonwong P, Fahy K, Hastie C.	No	No	Targeted population	No
Certain conditions originating in the perinatal period	Preterm birth		Interventions during pregnancy to prevent preterm birth: an overview of Cochrane systematic reviews.	2018	Broad	Pregnant women	Midwife‐led continuity models of care, group antenatal care, screening for lower genital tract infections, zinc supplementation, cervical cerclage, bedrest, antibiotic prophylaxis, pharmacological interventions for smoking cessation, vitamin D, calcium and other mineral supplements, intramuscular progesterone	Preterm birth, perinatal death	Medley N, Vogel JP, Care A, Alfirevic Z.	No	No	Targeted population	No
Certain conditions originating in the perinatal period	Preterm birth		WHO recommendations on interventions to improve preterm birth outcomes	2015	Broad	Pregnant women	Antenatal corticosteroids, tocolysis, magnesium sulfate, antibiotic prophylaxis, mode of preterm birth (for the mother) and Kangaroo mother care, plastic wraps, continuous positive airway pressure therapy, surfactant and oxygen therapy (for the newborn)	Critical maternal outcomes considered were: ● birth prior to 28, 32, 34 or 37 weeks of gestation; ● pregnancy prolongation (interval between randomization into the study and birth, birth within 48 hours or birth within 7 days); ● severe maternal morbidity or death; ● maternal sepsis (chorioamnionitis, puerperal sepsis); ● severe adverse effects of treatment. Critical newborn outcomes considered w…	WHO Guideline Development Group	No	No	Targeted population	No
Circulatory system diseases	Treatment of venous thromboembolism with LMWH and UFH	3	Prophylaxis and treatment of venous thromboembolism (VTE) in patients with cancer: the Saudi clinical practice guideline.	2015	Broad	Patients with cancer-associated VTE	Oral anticoagulants, low-molecular-weight heparin (LMWH), unfractionated heparin (UFH)	Major and minor bleeding, death, symptomatic or recurrent VTE or DVT, infection, thrombocytopenia, post-phlebitic syndrome	Al-Hameed F, Al-Dorzi HM, Al Momen A, Algahtani F, Al Zahrani H, Al Saleh K, Al Sheef M, Owaidah T, Alhazzani W, Neumann I, Wiercioch W	No	No	Targeted population	No
Circulatory system diseases	Treatment of venous thromboembolism with LMWH and UFH		Management of venous thromboembolism: a systematic review for a practice guideline	2007	Broad	Patients with venous thromboembolism	Oral anticoagulants, low-molecular-weight heparin (LMWH), unfractionated heparin (UFH), catheter-directed thrombolysis, inferior vena cava filters, compression stockings	Recurrent DVT, pulmonary embolism, vein patency, PTS	Segal JB, Streiff MB, Hofmann LV, Thornton K, Bass EB.	No	Yes	Targeted population	No
Circulatory system diseases	Treatment of venous thromboembolism with LMWH and UFH		Venous thromboembolism: advances in diagnosis and treatment	2018	Broad	Outpatients with cancer	Oral anticoagulants, thrombolysis, inferior vena cava filters, graduated compression stockings	Major bleeding, death, symptomatic or recurrent VTE, PTS	Tritschler T, Kraaijpoel N, Le Gal G, Wells PS.	No	No	Targeted population	No
Circulatory system diseases	Treatment of venous thromboembolism with LMWH and UFH	2 (with Tritschler)	Treatment of venous thromboembolism with low-molecular-weight heparin: a synthesis of the evidence published in systematic literature reviews.	2004	Narrow	Patients with isolated deep venous thrombosis or deep venous thrombosis with concomitant pulmonary embolism	Low-molecular-weight heparins (LMWHs) compared with intravenous unfractionated heparin (UFH)	Recurrence of symptomatic VTE, major bleeding and all-cause mortality	Krishnan JA, Segal JB, Streiff MB, Bolger DT, Eng J, Jenckes MW, Tamariz LJ, Bass EB.	No	No		No
Digestive system diseases	Periodontal treatment and glycaemic control	2	Systematic review and assessment of systematic reviews examining the effect of periodontal treatment on glycemic control in patients with diabetes.	2017	Narrow	Patients with type 1 or type 2 diabetes diagnosed with periodontitis, regardless of the classification.	Periodontal treatment with or without adjunctive use of local drug delivery and systemic antibiotics	Glycated hemoglobin (HbA1c)	Hasuike A, Iguchi S, Suzuki D, Kawano E, Sato S.	No	No		Yes	HbA1c was primary outcome of Botero
Digestive system diseases	Periodontal treatment and glycaemic control		Periodontal treatment and glycaemic control in patients with diabetes and periodontitis: an umbrella review	2016	Narrow	Patients with type 1 and 2 diabetes and periodontitis	Non‐surgical periodontal therapy with or without antimicrobials with control, which included no treatment, delayed treatment or supragingival prophylaxis	Glycated hemoglobin (HbA1c), fasting glucose levels	Botero JE, Rodriguez C, Agudelo‐Suarez AA.	No	No		Yes	HbA1c was primary outcome; fasting glucose was secondary
Endocrine, nutritional and metabolic diseases	Food supplements for body weight reduction	2	Dietary supplements for body-weight reduction: a systematic review.	2004	Broad	Not reported	Dietary supplements: chitosan, chromium picolinate, Ephedra sinica, Garcinia cambogia, glucomannan, guar gum, hydroxy-methylbutyrate, plantago psyllium, pyruvate, yerba maté, and yohimbe; food supplements, herbal products, phytotherapy.	Weight, BMI, fat mass	Pittler MH, Ernst E.	Yes	No	Non-targeted	No
Endocrine, nutritional and metabolic diseases	Food supplements for body weight reduction		Food supplements for body weight reduction: a systematic review of systematic reviews.	2012	Broad	Not reported	Guar gum, chitosan, chromium picolinate, Ephedra sinica, Citrus aurantium (bitter orange), conjugated linoleic acid, calcium, glucomannan, camellia sinensis (green tea)	Weight, BMI, adverse events	Onakpoya IJ, Wider B, Pittler MH, Ernst E.	Yes	No	Non-targeted	No
Endocrine, nutritional and metabolic diseases	Diets to reduce weight and obesity	3	Low‐carbohydrate diets for overweight and obesity: a systematic review of the systematic reviews.	2018	Narrow	Adults with overweight and obesity with baseline body mass index (BMI) ≥25 kg/m2	Low-carbohydrate diets to a control diet (low fat diets or calorie-restricted diets); papers were excluded if the intervention included additional components such as exercise or drugs	Body weight, lipid profile, fasting blood glucose and insulin, blood pressure glucose tolerance test, adverse effects	Churuangsuk C, Kherouf M, Combet E, Lean M.	No	No		No
Endocrine, nutritional and metabolic diseases	Diets to reduce weight and obesity		Improving diet and physical activity to reduce population prevalence of overweight and obesity: An overview of current evidence.	2014	Broad	Children (post-birth) or adults of any age	interventions targeting the treatment or prevention of overweight or obesity (including any intervention approach, i.e. diet, pharmaceutical or surgical)	Body weight; physical activity, diet type, sedentary time	Stephens SK, Cobiac LJ, Veerman JL.	No	No	Non-targeted	No
Endocrine, nutritional and metabolic diseases	Diets to reduce weight and obesity		Nutritional interventions for optimizing healthy body composition in older adults in the community: an umbrella review of systematic reviews.	2016	Broad	Older adults (aged 60 years or older) living in the community	Six types of nutritional interventions were pre-specified: (i) dietary programs, (ii) nutritional supplements, (iii) meal replacements, (iv) food groups, (v) food delivery support and eating behavior, and (vi) nutrition counselling and education.	Measures of body composition including: (i) nutritional status (e.g. proportion of overweight or underweight patients)’ (ii) fat mass (kg)’ (iii) lean mass or muscle mass (kg)’ (iv) weight (kg) or BMI (kg/m2), (v) bone mass (kg) or bone measures such as bone mineral density, and (vi) hydration status	Schultz TJ, Roupas P, Wiechula R, Krause D, Gravier S, Tuckett A, Hines S, Kitson A.	No	No	Targeted population	No
Endocrine, nutritional and metabolic diseases	Web-based interventions for weight loss	2	Web-based interventions for weight loss or weight loss maintenance in overweight and obese people: a systematic review of systematic reviews.	2017	Broad	Overweight and/or obese people with no restrictions for participant age	Web-based intervention for weight loss (delivered over the Internet)	Body weight and/or weight loss maintenance on the absolute variation and/or the change in percentage of body weight or body mass index (BMI)	Sorgente A, Pietrabissa G, Manzoni GM, Re F, Simpson S, Perona S, Rossi A, Cattivelli R, Innamorati M, Jackson JB, Castelnuovo G.	No	No	Targeted population	No
Endocrine, nutritional and metabolic diseases	Web-based interventions for weight loss		Mobile and Web 2.0 interventions for weight management: an overview of review evidence and its methodological quality.	2016	Broad	Overweight and/or obese people	Mobile or Web 2.0 Internet and related technologies for promoting weight management (WM), physical activity (PA), or dietary-related behaviours	Body weight, BMI, diet and physical activity	Bardus M, Smith JR, Samaha L, Abraham C.	No	No	Targeted population	No
Endocrine, nutritional and metabolic diseases	Childhood obesity interventions	2	Systematic review on evidence-based adolescent nutrition interventions.	2011	Broad	Adolescents (10–19 years) and women of reproductive age, including pregnant women	Micronutrient supplementation (iron, folic acid, iron–folic acid (IFA), calcium, vitamin D, vitamin A, zinc, iodine, and multiple micronutrients), food/protein energy supplementation, nutrition education for pregnant adolescents, obesity prevention and management, and management of gestational diabetes	Anthropometrics (height, weight, body mass index (BMI), stunting), mortality (death rate, death due to any disease, fatality rate, perinatal/neonatal mortality), pregnancy outcomes (preterm births, preeclampsia, eclampsia, stillbirth, miscarriage, termination of pregnancy), morbidity (obesity, obesity‐related complications, hypertension, diabetes, cardiovascular disease, infectious diseases), nut…	Lassi, Z.S., Moin, A., Das, J.K., Salam, R.A., Bhutta, Z.A.	No	No	Targeted population	No
Endocrine, nutritional and metabolic diseases	Childhood obesity interventions		How useful are systematic reviews of child obesity interventions?	2010	Broad	Overweight and/or obese cildren (age not specified)	Diet, nutrition, physical activity, or sedentary behaviour interventions	Body weight, body mass index, % body fat, skin-folds	Wolfenden L, Wiggers J, d'Espaignet ET, Bell AC.	No	No	Targeted population	No
External causes of morbidity and mortality	Effects of coffee	2	Coffee, caffeine, and health outcomes: an umbrella review.	2017	Broad	Humans	Coffee and caffeine consumption	Risk of breast, colorectal, colon, endometrial, and prostate cancers; cardiovascular disease and mortality; Parkinson's disease; and type-2 diabetes	Grosso G, Godos J, Galvano F, Giovannucci EL.	No	No	Targeted intervention	No
External causes of morbidity and mortality	Effects of coffee		Coffee consumption and health: umbrella review of meta-analyses of multiple health outcomes	2017	Broad	Adults	Coffee consumption	Systolic and diastolic blood pressure, total cholesterol, low density lipoprotein (LDL) cholesterol, high density lipoprotein (HDL) cholesterol, triglyceride, preterm birth, small for gestational age, and birth weight	Poole R, Kennedy OJ, Roderick P, Fallowfield JA, Hayes PC, Parkes J.	No	No	Targeted intervention	No
Factors influencing health status and contact with health services	Effects of financial arrangements for health systems in low-income countries	2	Supporting the delivery of cost-effective interventions in primary health-care systems in low-income and middle-income countries: an overview of systematic reviews.	2008	Broad	LMICs (country/region or primary health care mentioned in the abstract or title; review question or studies included in the review focused explicitly on low-income and middle-income countries or primary health care)	Governance, financial and delivery arrangements and implementation strategies	Intersectoralaction, equity /reduce inequalities, participation in health by consumers, quality care, effective care. coverage/access, appropriate healthcare including referral systems	Lewin S, Lavis JN, Oxman AD, Bastías G, Chopra M, Ciapponi A, Flottorp S, Martí SG, Pantoja T, Rada G, Souza N.	Yes	No	Non-targeted	No
Factors influencing health status and contact with health services	Effects of financial arrangements for health systems in low-income countries		Financial arrangements for health systems in low‐income countries: an overview of systematic reviews.	2017	Broad	LMICs (address a problem that is important in low‐income countries, would be feasible, and would be of interest to decision‐makers in low‐income countries)	Financial arrangements (collection of funds, insurance schemes, purchasing of services, financial incentives for recipients of care or providers of care)	Patient outcomes (health and health behaviours), the quality or utilisation of healthcare services, resource use, healthcare provider outcomes (such as sick leave), or social outcomes (such as poverty, employment, or financial burden of patients, e.g. out‐of‐pocket payment, catastrophic disease expenditure)	Wiysonge CS, Paulsen E, Lewin S, Ciapponi A, Herrera CA, Opiyo N, Pantoja T, Rada G, Oxman AD.	Yes	Yes	Non-targeted	No
Factors influencing health status and contact with health services	Physical activity promotion in children and adolescents	3	a) Physical activity and mental health in children and adolescents: a review of reviews. b) Physical activity and mental health in children and adolescents: An updated review of reviews and an analysis of causality	2011 2019	Narrow	School-aged children or adolescents up to and including 18 years with no known physical health limitations	Physical activity promotion intervention	Depression, self-esteem, cognitive functioning, anxiety	Biddle SJ, Asare M.	Yes	Yes		No
Factors influencing health status and contact with health services	Physical activity promotion in children and adolescents		The effect of community and family interventions on young people's physical activity levels: a review of reviews and updated systematic review.	2011	Broad	Healthy children (18 or younger)	Physical activity promotion intervention outside of the school setting and not delivered in a clinical setting	Physical activity, body composition and fitness	van Sluijs EM, Kriemler S, McMinn AM.	No	No	Targeted population	No
Factors influencing health status and contact with health services	Physical activity promotion in children and adolescents		Interventions designed to reduce sedentary behaviours in young people: a review of reviews.	2014	Broad	Children (18 or younger)	Interventions to reduce sedentary behaviour - including informational, behavioural, environmental, or social support strategies	Quantitative measures of sedentary behaviour (inc accelerometer data, self-report)	Biddle SJ, Petrolini I, Pearson N.	Yes	No	Targeted population	No
Factors influencing health status and contact with health services	Vitamin D supplementation	4	Vitamin D and multiple health outcomes: umbrella review of systematic reviews and meta-analyses of observational studies and randomised trials.	2014	Broad	Any population reporting cirulating vitamin D concentrations	Effect of vitamin D supplementation	Outcome categories: autoimmune diseases, cancer outcomes, cardiovascular outcomes, cognitive disorders, infectious diseases, metabolic disorders, neonatal/infant/child related outcomes, pregnancy related outcomes, skeletal outcomes (including falls)	Theodoratou E, Tzoulaki I, Zgaga L, Ioannidis JP.	No	No	Targeted intervention	No
Factors influencing health status and contact with health services	Vitamin D supplementation		Effect of vitamin D supplementation on non-skeletal disorders: a systematic review of meta-analyses and randomised trials.	2017	Broad	Participants of all ages, including pregnant women	Vitamin D supplementation and non-skeletal disorders	All-cause mortality, cancer mortality, cardiovascular disease, adiposity, glucose metabolism, mood disorders, muscular function, tuberculosis, and colorectal adenomas, or on maternal and perinatal conditions, cancer biomarkers of systemic inflammation, upper respiratory tract infections and asthma exacerbations, chronic inflammation, acute infections	Autier P, Mullie P, Macacu A, Dragomir M, Boniol M, Coppens K, Pizot C, Boniol M.	No	No	Targeted intervention	No	similar to #36 but different outcomes of interest (e.g. includes TB whereas 36 excluded)
Factors influencing health status and contact with health services	Vitamin D supplementation		What do Cochrane systematic reviews say about interventions for vitamin D supplementation?	2017	Broad	Healthy individuals or those diagnosed with any clinical condition were included, regardless of age, ethnicity or sex	Vitamin D supplementation, in any form (active or non-active), presentation (capsules or oral solution), dose (high, conventional or underdoses), regimen or duration of use, as a single or combined intervention	Mortality, hip fracture, LADA, preventing asthma attacks or improving disease control, atopic eczema (pruritus or sleep loss, or reduction in the number of flares or need for other treatments; overall severity assessed by participants or physicians, quality of life or adverse events), sickle cell disease severity, multiple sclerosis relapse ratea, relapse-free, disability score, epilepsy seizure …	Mateussi MV, Latorraca CD, Daou JP, Martimbianco AL, Riera R, Pacheco RL, Pachito DV.	No		Targeted intervention	No
Factors influencing health status and contact with health services	Vitamin D supplementation		Non-skeletal health effects of vitamin D supplementation: A systematic review on findings from meta-analyses summarizing trial data.	2017	Broad	Unspecified	Non-skeletal effects of vitamin D supplementation	CVD, blood pressure, type 2 diabetes (T2D), body weight, birth weight, malignant diseases, respiratory tract infections (excluding tuberculosis), depression, and mortality	Rejnmark L, Bislev LS, Cashman KD, Eiríksdottir G, Gaksch M, Grübler M, Grimnes G, Gudnason V, Lips P, Pilz S, Van Schoor NM.	No		Targeted intervention	No
Factors influencing health status and contact with health services	Reduction interventions of alcohol intake	2	Effectiveness of brief interventions in primary health care settings to decrease alcohol consumption by adult non-dependent drinkers: a systematic review of systematic reviews.	2015	Narrow	Adult non-dependent drinkers defined variously as hazardous drinkers, at-risk drinkers, or excessive drinkers	Brief interventions in the primary health care setting to decrease alcohol consumption	1) alcohol consumption during a specific period, usually one week, and 2) the number of participants who reported a level of consumption below the established risk levels.	Alvarez-Bueno C, Rodriguez-Martin B, Garcia-Ortiz L, Gómez-Marcos MÁ, Martinez-Vizcaino V.	No	No		No
Factors influencing health status and contact with health services	Reduction interventions of alcohol intake		The impact of brief alcohol interventions in primary healthcare: a systematic review of reviews.	2013	Broad	Women, older and younger drinkers, minority ethnic groups, dependent/co-morbid drinkers and those living in transitional and developing countries	Alcohol, brief intervention, early intervention, alcohol therapy, and counselling in the primary care setting	Drinking quantity and/or frequency, drinking intensity and drinking within recommended limits.	O'Donnell A, Anderson P, Newbury-Birch D, Schulte B, Schmidt C, Reimer J, Kaner E.	No	No	Non-targeted	No
Factors influencing health status and contact with health services	Reduction interventions of alcohol intake	2	Universal prevention of alcohol and drug use: An overview of reviews in an Australian context.	2018	Broad	Universal interventions target entire populations within particular settings without prior screening for risk factors	Universal alcohol and illicit drug prevention strategies in the following stettings: family, school, college, workplace, leisure, healthcare, community, media and policy	Substance use (including initiation of use, proportion of users, quantity or frequency of use)	Mewton L, Visontay R, Chapman C, Newton N, Slade T, Kay‐Lambkin F, Teesson M.	No	No	Non-targeted	No
Factors influencing health status and contact with health services	Reduction interventions of alcohol intake		Population-level interventions to reduce alcohol-related harm: an overview of systematic reviews.	2013	Broad	Population-level interventions in non-clinical settings	Alcohol interventions on consumption or alcohol-related health or social outcomes	Sales, total consumption or initiation, consumption pattern, alcohol-related crashes and driving under the influence, violence, intoxication, disorder, server behaviour, alcohol-related medical conditions, crime, STDs/risky sexual behaviour, hospitalisations, blood-alcohol concentration, workplace injuries and fatalities, alcohol-related morbidity and mortalit	Martineau F, Tyner E, Lorenc T, Petticrew M, Lock K.	No	No	Non-targeted	No
Factors influencing health status and contact with health services	Behavioral Counseling and Pharmacotherapy Interventions for Tobacco Cessation	overlaps with below	Smoking cessation guidelines for health professionals: an update.	2000	Broad	Unspecified	Brief opportunistic advice to stop from a health care professional and behavioural support to aid quit attempts (e.g. brief advice up to 5 minutes), counselling and advice, through coping skills training to group support, nicotine replacement therapy, bupropion, telephone counselling, self-help materials	Abstinence for at least six months, incremental cessation rate defined as proportions of all smokers receiving the intervention who stop smoking over and above those (in the control group) who would have stopped anyway	West R, McNeill A, Raw M.	No		Non-targeted	No
Factors influencing health status and contact with health services	Behavioral Counseling and Pharmacotherapy Interventions for Tobacco Cessation	5 individual-level	Behavioral Counseling and Pharmacotherapy Interventions for Tobacco Cessation in Adults, Including Pregnant Women: A Review of Reviews for the U.S. Preventive Services Task Force.	2015	Broad	Adults, including pregnant women and specific subpopulations of adults (such as persons with depression and young adults)	Behavioral and pharmacologic interventions for tobacco cessation: physician- and nurse-delivered counseling interventions, tailored self-help print materials, and telephone counseling, nontailored self-help materials, interactive or tailored Internet or computer programs, mobile telephones, biomedical risk assessment, exercise, acupuncture, and hypnotherapy	Mortality from respiratory illnesses, coronary disease mortality, and lung cancer incidence and mortality at 20-year follow-up, tobacco cessation	Patnode CD, Henderson JT, Thompson JH, NCBI Bookshelf.	No		Non-targeted	No
Factors influencing health status and contact with health services	Behavioral Counseling and Pharmacotherapy Interventions for Tobacco Cessation		Systematic review: smoking cessation intervention strategies for adults and adults in special populations.	2006	Broad	Adults who were age 13 years and older, that included both sexes, and that were racially and ethnically diverse	Individual cessation strategies including counseling and behavioral therapy, first-line and second-line medications	Tobacco cessation rates	Ranney L, Melvin C, Lux L, McClain E, Lohr KN.	No		Non-targeted	No
Factors influencing health status and contact with health services	Behavioral Counseling and Pharmacotherapy Interventions for Tobacco Cessation		Effectiveness of smoking cessation interventions among adults: a systematic review of reviews.	2008	Broad	Adult current smokers at the start of the intervention of 18 years and older, of any sex, race or socioeconomic status.	Interventions to reduce smoking prevalence to prevent diseases caused by the active inhalation of tobacco smoke.	Smoking cessation defined as a discontinuation of tobacco use through inhalation during at least 6 months after the start of the intervention	Lemmens V, Oenema A, Knut IK, Brug J.	No		Non-targeted	No
Factors influencing health status and contact with health services	Behavioral Counseling and Pharmacotherapy Interventions for Tobacco Cessation		Effectiveness of smoking cessation interventions: review of evidence and implications for best practice in Australian health care settings.	2003	Broad	Individual level including adults, adolescents, pregnant and lactating women and Aboriginal and Torres Strait Islander people	Behavioural, clinical and pharmacological cessation interventions that can be used by or with individuals who smoke, but did not extend to mass media campaigns or other strategies that promote quitting at a broader population level.	Continuous abstinence from smoking (preferably biochemically assessed) for at least five months (except in relation to pregnancy).	Miller M, Wood L.	No		Non-targeted	No
Factors influencing health status and contact with health services	Behavioral Counseling and Pharmacotherapy Interventions for Tobacco Cessation		Efficacy of non-pharmacological methods used for treating tobacco dependence: meta-analysis.	2007	Broad	Adults	Non-pharmacological methods used for treating tobacco dependence	Sustained smoking cessation, i.e. for six months or longer.	Bala MM, Lesniak W.	No		Non-targeted	No
Factors influencing health status and contact with health services	Pharmacological interventions for smoking cessation	2	Pharmacological interventions for smoking cessation: an overview and network meta‐analysis.	2013	Broad	Adult smokers, of either gender, and of any nationality and ethnicity	Nicotine replacement therapy, antidepressants (bupropion and nortriptyline); nicotine receptor partial agonists (varenicline and cytisine); anxiolytics; selective type 1 cannabinoid receptor antagonists (rimonabant); clonidine; lobeline; dianicline; mecamylamine; Nicobrevin; opioid antagonists; nicotine vaccines; and silver acetate	Sustained smoking cessation, i.e. for six months or longer.	Cahill K, Stevens S, Perera R, Lancaster T.	No		Non-targeted	No	48 and 49 are very similar - search strategies would be very close to the same but the SRs ended up with slightly diferent interventions
Factors influencing health status and contact with health services	Pharmacological interventions for smoking cessation		Efficacy of pharmacological methods used for treating tobacco dependence: meta-analysis.	2008	Broad	Adults	Pharmacological methods used in smoking cessation.	At least a 12-month continuous abstinence (refraining from smoking from the moment of smoking cessation for the period of 12 months; occasional slips/lapses are possible) or prolonged abstinence (refraining from smoking from the moment of smoking cessation for 12 months; during the first two weeks from the target date of smoking cessation, isolated lapses are possible)	Bała MM, Leśniak W, Strzeszyński Ł.	No		Non-targeted	No
Factors influencing health status and contact with health services	Exercise therapy	5	Exercise therapy for bone and muscle health: an overview of systematic reviews.	2012	Broad	Adult patients with any of the following fibromyalgia, low back pain, neck pain, and shoulder pain, osteoarthritis, rheumatoid arthritis, ankylosing spondylitis, and osteoporosis	Exercise therapy	1) any measure of pain, and 2) physical disability or physical function	Hagen KB, Dagfinrud H, Moe RH, Østerås N, Kjeken I, Grotle M, Smedslund G	No	No	Non-targeted	No
Factors influencing health status and contact with health services	Exercise therapy		Effects of exercise on bone status in female subjects, from young girls to postmenopausal women: an overview of systematic reviews and meta-analyses	2016	Broad	Young girls and adult women (premenopause, postmenopause, or elder) without pathological diseases affecting bone metabolism, as measured by DXA or pQCT and supported (or not) by measurement of biomarkers of bone metabolism	Exercise and physical activity interventions	Areal bone mineral density (aBMD) and bone mineral content (BMC), as measured by dual x-ray absorptiometry (DXA), or volumetric BMD (vBMD) and bone strength indexes (BSIs), as measured by peripheral quantitative computed tomography (pQCT),	Xu J, Lombardi G, Jiao W, Banfi G.	No	no	Non-targeted	No
Factors influencing health status and contact with health services	Exercise therapy		Effectiveness of exercise therapy: a best-evidence summary of systematic reviews.	2005	Broad	Children and adult patients with disorders of the musculoskeletal, nervous, respiratory, and cardiovascular systems (no age restirction)	Exercise therapy	Pain, activities of daily living (ADL), walking distance, return to work	Smidt N, De Vet HC, Bouter LM, Dekker J	No	no	Non-targeted	No
Factors influencing health status and contact with health services	Exercise therapy		Exercise therapy for functional capacity in chronic diseases: an overview of meta-analyses of randomised controlled trials.	2017	Broad	Adult patients with chronic diseases	non pharmacological: exercise therapy with no treatment or usual care	peak oxygen consumption, muscle strength, physical function, walking distance, disability, endurance, walking/cycling speed, walking time, flexbility, aerobic/anaerobic capacity, balance, motor function	Pasanen T, Tolvanen S, Heinonen A, Kujala UM	No	Yes	Non-targeted	No
Factors influencing health status and contact with health services	Exercise therapy		Exercise prescription for hospitalized people with chronic obstructive pulmonary disease and comorbidities: a synthesis of systematic reviews.	2012	Broad	Hospitalised patients with multimorbidities who experience an acute exacerbation of COPD (18 years to the “very elderly”)	Exercise therapy	Strength , frequency, intensity, time of exercises	Reid WD, Yamabayashi C, Goodridge D, Chung F, Hunt MA, Marciniuk DD, Brooks D, Chen YW, Hoens AM, Camp PG.	No	No	Targeted population	No
Factors influencing health status and contact with health services	Exercise to relieve pain	4	Physical activity and exercise for chronic pain in adults: an overview of Cochrane Reviews.	2017	Broad	Adults (18 years and over) reporting chronic noncancer pain, including persistent and intermittent pain, for at least three months (12 weeks) in any body site.	Physical activity or exercise	Pain (severity); physical function (objectively or subjectively measured); psychological function, (4) quality of life, (5) adherence to the prescribed intervention, (6) health care use/ attendance, (7) adverse events, and (8) death.	Geneen LJ, Moore RA, Clarke C, Martin D, Colvin LA, Smith BH.	No	No	Non-targeted	No
Factors influencing health status and contact with health services	Exercise to relieve pain		Effectiveness of Aquatic Exercise and Balneotherapy: A Summary of Systematic Reviews Based on Randomized Controlled Trials of Water Immersion Therapies.	2010	Narrow	Any people (selection not restricted to disase status of participants; ppl are either healthy or with locomoter diseases)	Aquatic exercise or balneotherapy	Pain relief and related outcome measures of locomotor diseases (eg, arthritis, rheumatoid diseases, and low back pain). Health improvement or the effectiveness of cure, health improvement defined broadly and encompassed improvements in blood pressure, serum lipid profile, immunity, and quality of life.	Kamioka H, Tsutani K, Okuizumi H, Mutoh Y, Ohta M, Handa S,	No	No		No
Factors influencing health status and contact with health services	Exercise to relieve pain		Effectiveness of Pilates exercise in treating people with chronic low back pain: a systematic review of systematic reviews.	2013	Narrow	Participants with chronic low back pain, that is, localised pain in the lumbar region that lasts for more than three months	Pilates	Pain, disability, that is, impairments, activity limitations or participation restrictions according to the International Classification of Health, Functioning, and Disability. Pain is considered a functional impairment in the ICF.	Wells C, Kolt GS, Marshall P, Hill B, Bialocerkowski A.	No	No		No
Factors influencing health status and contact with health services	Exercise to relieve pain		Exercise interventions for non-specific low back pain: an overview of systematic reviews.	2009	Broad	Adult aged between 18 and 65 years with back pain of specific cause such as nerve root involvement, lumbar disc herniation and spinal surgery	Exercises including general physical fitness, aerobic exercise, muscle strengthening, flexibility and stretching exercises.	Pain and functional outcomes: Pain intensity, strength, disability, overall treatment effect, return to work, psychological status	Swinkels A, Cochrane K, Burt A, Johnson L, Lunn T, Rees AS.	No	No	Non-targeted	No
Factors influencing health status and contact with health services	Physiotherapy exercise	2	Therapeutic exercise in physiotherapy practice is beneficial: a summary of systematic reviews 2002–2005.	2007	Broad	Any people who need to see a physiotherapist	Therapeutic exercise, progressive resistance exercise, rehabilitation exercise, movement therapy, motion therapy, physical therapy, physiotherapy, and kinesiotherapy.	Impairment, activity limitation, and societal participation in a therapeutic exercise program	Taylor NF, Dodd KJ, Shields N, Bruder A.	YEs	Yes	Non-targeted	No
Factors influencing health status and contact with health services	Physiotherapy exercise		Progressive resistance exercise in physical therapy: a summary of systematic reviews.	2005	Broad	People with an impairment of body structure or function, such as people with muscle force deficit (eg, older people) or people with pathology affecting movement (eg, stroke)	Progressive resistance exercise as prescribed by a physical therapist, of sufficient intensity (eg, 60%–80% of 1 repetition maximum) and progression of resistance	Impairment, activity limitation, and societal participation in a therapeutic exercise program	Taylor NF, Dodd KJ, Damiano DL	Yes	No	Targeted intervention	No
Factors influencing health status and contact with health services	Exercise to relieve fatigue	2	Exercise and cancer-related fatigue in adults: a systematic review of previous systematic reviews with meta-analyses.	2017	Broad	Adults 18 years of age and older who were cancer patients or cancer survivors with any type of cancer	Aerobic exercise (walking, swimming, etc.), resistance/strength training (weight training) lasting at least 3 weeks in length	Cancer realted fatigure as measured by the Functional Assessment of Cancer Therapy scale, and the Piper Fatigue scales, and adverse events	Kelley GA, Kelley KS.	Yes	Yes	Non-targeted	No
Factors influencing health status and contact with health services	Exercise to relieve fatigue		Exercise and sleep: a systematic review of previous meta‐analyses.	2017	Broad	Adult humans ≥18 years of age (specifically participants with certain characteristics: obstructive sleep apnea, cancer, and older adults with sleep problems)	Exercise (aerobic, strength or both)	Sleep quality, sleep duration, sleep efficiency, sleep disturbance, daytime functioning, subjective sleep, and sleep latency	Kelley GA, Kelley KS	Yes	NO	Non-targeted	No
Factors influencing health status and contact with health services	Influenza vaccination	3	Assessing the state of knowledge regarding the effectiveness of interventions to contain pandemic influenza transmission: a systematic review and narrative synthesis.	2016	Broad	Not reported	Pharmaceutical interventions include pandemic influenza vaccine, vaccination policies and antiviral use. Non-pharmaceutical interventions include school and work closures, social distancing and contact reduction, use of masks, hand hygiene, and cough etiquette.	1. Pandemic influenza vaccine effectiveness 2. Antiviral effectiveness 3. Seasonal influenza vaccine effectiveness 4. Personal protective measure effectiveness 5. School closure effectiveness 6. Traditional chinese medicine effectiveness	Saunders-Hastings P, Reisman J, Krewski D	No	No	Non-targeted	No
Factors influencing health status and contact with health services	Influenza vaccination		Effectiveness and harms of seasonal and pandemic influenza vaccines in children, adults and elderly: a critical review and re-analysis of 15 meta-analyses.	2012	Broad	Healthy children, adults or elderly	Seasonal, H5N1 and 2009 H1N1 influenza vaccines (specifically live-attenuated vaccine; parenteral inactivated vaccine; and aerosol inactivated vaccine)	Laboratory confirmed cases (LCC), clinically confirmed cases (CCC), adverse events (mild/moderate and severe), incidence of acute otitis media (for children), hospitalizations (for adults and elderly), and mortality (for elderly)	Manzoli L, Ioannidis JP, Flacco ME, De Vito C, Villari P	No	No	Non-targeted	No
Factors influencing health status and contact with health services	Influenza vaccination		Preventing influenza: an overview of systematic reviews.	2005	Broad	Healthy adults and children	Vaccination, neuraminidase inhibitors, homoeopathic Oscillococcinum, amantadine and rimantadine	Cases of serologically confirmed influenza, clinical influenza cases, exacerbation of asthma	Van der Wouden JC, Bueving HJ, Poole P.	No		Non-targeted	No
Genitourinary system diseases	Acupuncture for managing gynaecologic conditions	3	Acupuncture in obstetrics and gynecology: an overview of systematic reviews.	2011	Broad	Women with gynecological conditions	Any type of acupuncture	Hot flashes, conception, dysmenorrhea, premenstrual syndrome, nausea/vomiting, breech presentation, back pain during pregnancy, and procedural pain	Ernst E, Lee MS, Choi TY	No		Targeted intervention	No
Genitourinary system diseases	Acupuncture for managing gynaecologic conditions		The use of acupuncture for managing gynaecologic conditions: An overview of systematic reviews.	2011	Broad	Women with breast cancer, menstrual symptoms, infertility, uterine fibroids and polycystic ovary syndrome	Acupuncture	Side effects of breast cancer chemotherapy, menstrual disturbances, menopausal symptoms, female infertility, uterine fibroids and polycystic ovary syndrome, rates of pregnancy and live birth	Kang HS, Jeong D, Kim DI, Lee MS.	No		Targeted intervention	No
Genitourinary system diseases	Acupuncture for managing gynaecologic conditions		Acupuncture to treat common reproductive health complaints: An overview of the evidence.	2010	Broad	Women with period pain or dysmenorrhea, or premenstrual syndrome, or poly cystic ovarian syndrome/PCOS, or menstrual headache, or irregular periods/menstruation, or amenorrhea, or heavy menses/periods, or menorrhagia, or menopause	Manual acupuncture and electro-acupuncture	Hot flushes, menopausal symptoms, pain relief	Smith CA, Carmady B.	No		Targeted intervention	No
Genitourinary system diseases	Acupuncture for management of pregnancy-related symptoms	2	Evaluation of outpatient acupuncture for relief of pregnancy‐related conditions.	2018	Broad	Unselected or low-risk pregnant women of all ages and at any stage of pregnancy who were treated with acupuncture versus standard care, no treatment, or placebo and/or sham acupuncture in an ambulatory setting	Acupuncture	course of pregnancy; labor pain; nausea; retching; vomiting; back pain; quality of life; and adverse events	Buchberger B, Krabbe L	No	Yes	Targeted intervention	No
Genitourinary system diseases	Acupuncture for management of pregnancy-related symptoms		Findings and methodological quality of systematic reviews focusing on acupuncture for pregnancy-related acute conditions.	2018	Broad	Pregnant women presenting with acute conditions, such as pain, sleep disturbance or nausea	All types of acupuncture technique, regardless of the duration or frequency of treatment, were included in the review	All outcomes were considered for inclusion, including clinical, laboratory and administrative/economic	Bergamo TR, Latorraca COC, Pachito DV, Martimbianco ALC, Riera R	No	Yes	Targeted intervention	No
Genitourinary system diseases	Assisted reproductive technologies (ARTs)	2	Assisted reproductive technologies (ARTs): evaluation of evidence to support public policy development	2014	Narrow	Couples 18 years of age and older with infertility	In vitro fertilization (IVF)/intracytoplasmic sperm injection (ICSI)	Neonatal/infant complications (e.g., ectopic pregnancy, low birth weight, neonatal/perinatal mortality, birth defects, congenital malformations); Pregnancy and delivery complications (e.g., OHSS, ectopic pregnancy, preeclampsia, caesarean delivery, preterm birth, indicators of cycle success (e.g., number of oocytes retrieved, cycle cancellation, implantation); Pregnancy, miscarriage, live birth; …	Nardelli AA, Stafinski T, Motan T, Klein K, Menon D	No	No		No	Subfertility differs from infertility
Genitourinary system diseases	Assisted reproductive technologies (ARTs)		Assisted reproductive technology: an overview of Cochrane Reviews.	2018	Narrow	Couples with subfertility seeking a pregnancy and undergoing assisted reproductive technologies	In vitro fertilisation (IVF) and intracytoplasmic sperm injection (ICSI)	Live birth, or the composite outcome of live birth or ongoing pregnancy, clinical pregnancy, multiple pregnancy, miscarriage, and ovarian hyperstimulation syndrome	Farquhar C, Marjoribanks J	No	No	Targeted population	No
Genitourinary system diseases	Lupus nephritis treatment	2	Is rituximab effective for induction of remission in lupus nephritis?.	2014	Broad	Patients with lupus nephritis type III, IV and type V.	Rituximab, methylprednisolone, prednisone, cyclophosphamide, high-dose corticosteroids, mycophenolate mofetil.	Complete renal response, partial renal response or no response, creatininemia, proteinuria, lupus activity indices (eg SLEDAI), function index, serological markers (anti DNA, C3 / C4), peripheral blood CD19 count and adverse effects.	Mac-Namara M, Rada G.	No	No	Targeted population	No
Genitourinary system diseases	Lupus nephritis treatment		Treatment for lupus nephritis: an overview of systematic reviews and meta-analyses.	2017	Broad	Patients with lupus nephritis, lupus glomerulonephritis, or lupus nephropathy	Cyclophosphamide, mycophenolate mofetil, tacrolimus, calcineurin inhibitors (including cyclosporine and tacrolimus), lefunomide, azathioprine, cyclosporine	Complete remission, partial remission, total response rate, serum creatinine, serum albumin, end-stage kidney disease, gastrointestinal, herpes zoster virus, end-stage renal disease, discontinuation due to adverse events	Chen Y, Sun J, Zou K, Yang Y, Liu G	No	No	Targeted population	No
Genitourinary system diseases	Urinary incontinence	3	What do Cochrane systematic reviews say about non-surgical interventions for urinary incontinence in women?	2018	Broad	Women who had been diagnosed with any type of urinary incontinence	Adrenergic agonists, mechanical devices, estrogens, pelvic floor muscle training, serotonin-noradrenaline reuptake inhibitor, biofeedback and feedback added to other therapies, bladder training, scheduled toileting and prompted voiding), prompted voiding (PV), habit retraining, pads, Acupuncture, transurethral radiofrequency collagen denaturation, urethral injection therapy, weighted vaginal cone…	Number of pad changes, incontinence episodes, improvement in symptoms, improvement of urinary incontinence, adverse events, rate of cure, perception of change in incontinence, women’s satisfaction	Costa AA, Vasconcellos IM, Pacheco RL, Bella ZI, Riera R.	No	No	Non-targeted	No
Genitourinary system diseases	Urinary incontinence		Systematic review of systematic reviews for the management of urinary incontinence and promotion of continence using conservative behavioural approaches in older people in care homes	2015	Broad	Older people (65+) in care homes (included 71% women approximately)	Conservative approaches for continence promotion, continence maintenance or management of incontinence (excluding drugs or surgical interventions) from behavioural or nursing perspectives (specifically incontinence pads, toileting training (bladder training, scheduled toileting and prompted voiding), prompted voiding (PV), habit retraining (HR), timed voiding , exercise alone, oxybutynin with PV,	Improvement in continence, quality of life, response to treatment,	Roe B, Flanagan L, Maden M.	No	No	Targeted population	No
Genitourinary system diseases	Urinary incontinence		Nonsurgical treatment of stress urinary incontinence (SUI): grading of evidence in systematic reviews.	2008	Broad	Women with stress and urge incontinence	Vaginal cones, pelvic floor exercises and other physical treatments, mechanical devices, estrogens, duloxetine, habit retraining including timed voids, biofeedback and electrical stimulation with pelvic floor muscle training (PFMT),	Response to treatment, incontinence episode frequency, quality of life, adverse effects, improvement	Latthe PM, Foon R, Khan K.	No	No	Targeted population	No
Genitourinary system diseases	Interventions to treat complex wounds	3	Systemic wound care: a meta-review of cochrane systematic reviews.	2014	Broad	Patients with chronic wounds, such as arterial or venous ulcers, pressure sores, and diabetic foot ulcers, but also for acute wounds after surgery or trauma	Compression therapy, oral pentoxifylline, hyperbaric oxygen, intermittent pneumatic compression, systemic antibiotics, endovenous thermal ablation, flavonoid-containing compounds (both micronized purified flavonoid fraction [MPFF] and hydroxyethylrutosides), therapeutic touch	Healing or significant improvement and adverse effects	Ubbink DT, Santema TB, Stoekenbroek RM.	No	No	Non-targeted	No
Genitourinary system diseases	Interventions to treat complex wounds		Seeking effective interventions to treat complex wounds: an overview of systematic reviews.	2015	Broad	Adults aged 18 years and older	Any interventions that treat complex wounds (including venous and arterial ulcers due to chronic illness, diabetic ulcers, pressure ulcers, and infected surgical wounds)	Wound healing (e.g., number of ulcers healed, improvement of ulcers, and time to ulcer healing), admission to hospital (including readmissions), wound area/size reduction, time to healing, proportion of patients with healed wounds, no healing improvmeent, length of hospitalization	Tricco AC, Antony J, Vafaei A, Khan PA, Harrington A, Cogo E, Wilson C, Perrier L, Hui W, Straus SE.	No	No	Non-targeted	No
Genitourinary system diseases	Interventions to treat complex wounds		An analysis of systematic reviews undertaken on standard advanced wound dressings in the last 10 years	2009	Broad	Patients with ulcers (venous, pressure, arterial and neuropathic) and acute wounds (eg, surgical wounds and donor sites).	‘Standard’ advanced wound dressings (SAWDs), comprised of films, foams, gels, hydrocolloids and alginates/Hydrofiber	Wound healing	Horkan L, Stansfield G, Miller M.	No	No	Non-targeted	No
Mental and behavioural disorders	Nonpharmacological treatment for behavioural and psychological disturbances	4	Nonpharmacological approaches for behavioural and psychological symptoms of dementia in older adults: A systematic review of reviews.	2018	Broad	Elders older than 65 years old with dementia	Social and psychological treatments: music therapy, exercises, aerobic activity, strength training, massage therapy, light therapy, topic aromatherapy, community based interventions, advisor services, case conferences	Reduction in behavioural and psychological symptoms of dementia: agitated behaviours, disturbances in mood, behaviours, thoughts, and perceptions, delutions, hallucinations, depression, agression, wandering, and disinhibition, repetitive behaviours, challenging behaviours, anxiety, misidentifications, apathy...etc	Legere LE, McNeill S, Schindel Martin L, Acorn M, An D.	No	No	Targeted population	No
Mental and behavioural disorders	Nonpharmacological treatment for behavioural and psychological disturbances		Systematic review of systematic reviews of non-pharmacological interventions to treat behavioural disturbances in older patients with dementia.	2017	Broad	elders with dementia	Sensory stimulation interventions (cupressure, aromatherapy, massage/touch therapy, light therapy and sensory garden, cognitive/emotion-oriented interventions (cognitive stimulation, music/dance therapy, dance therapy, snoezelen, transcutaneous electrical nerve stimulation, reminiscence therapy, validation therapy, simulated presence therapy); behaviour management techniques; exercise therapy, an…	Response to treatment measured by 1) multidomain scales 2) scales specific to agitation 3) scales specific to depression or anxiety	Abraha I, Rimland JM, Trotta FM, Dell'Aquila G, Cruz-Jentoft A, Petrovic M, Gudmundsson A, Soiza R, O'Mahony D, Guaita A, Cherubini A.	No	No	Targeted population	No
Mental and behavioural disorders	Nonpharmacological treatment for behavioural and psychological disturbances		What do Cochrane systematic reviews say about non-pharmacological interventions for treating cognitive decline and dementia?	2017	Broad	Patients diagnosed with cognitive impairment or dementia, regardless of etiology, including (but not limited to) mild cognitive impairment, vascular dementia, Alzheimer, mixed dementia and dementia secondary to other neurodegenerative diseases.	Non-pharmacological interventions including (but not limited to) psychological, social and educational interventions, acupuncture, physical exercise and physical therapy	Clinical, social and laboratory outcomes	Vilela VC, Pacheco RL, Latorraca CO, Pachito DV, Riera R.	No	No	Non-targeted	No
Mental and behavioural disorders	Nonpharmacological treatment for behavioural and psychological disturbances		Psychosocial interventions for people with dementia: a synthesis of systematic reviews.	2018	Broad	People with dementia	Psychosocial interventions as those physical, cognitive or social activities that may maintain or improve ‘functioning, interpersonal relationships and well-being in people with dementia’	Physical outcomes (waling speed, balance, reduced falls risk, strength exercises), cognitive outcomes, mood outcomes, behaviour outcomes	McDermott O, Charlesworth G, Hogervorst E, Stoner C, Moniz-Cook E, Spector A, Csipke E, Orrell M.	No	No	Non-targeted	No
Mental and behavioural disorders	Psychotherapy and non-medication-based interventions	3	Efficacy of pharmacotherapy and psychotherapy for adult psychiatric disorders: a systematic overview of meta-analyses.	2014	Broad	Adult psychiatric disorders	Classes of antipsychotic drugs, CBT and psychodynamic approaches	Response, relapse, and symptom score change	Huhn M, Tardy M, Spineli LM, Kissling W, Förstl H, Pitschel-Walz G, Leucht C, Samara M, Dold M, Davis JM, Leucht S.	No		Non-targeted	No
Mental and behavioural disorders	Psychotherapy and non-medication-based interventions		Cochrane Reviews of non-medication based psychotherapeutic and other interventions for schizophrenia, psychosis, and bipolar disorder: A systematic literature review.	2009	Broad	Patients with schizophrenia, psychosis, schizoaffective, or bipolar disorder	Psychotherapeutic or psychosocial interventions (assertive community treatment (ACT), crisis intervention, music therapy, psychoeducation, family intervention, cognitive behavioural therapy, token economy and prompts to encourage appointment attendance, case management, compulsory community and involuntary outpatient treatment, distraction techniques, and psychosocial therapy	Strong support that merits application, moderate support that warrants consideration of application, not supported, and data that is deemed inconclusive	Jung XT, Newton R.	No		Non-targeted	No
Mental and behavioural disorders	Psychotherapy and non-medication-based interventions		Does psychotherapy work? An umbrella review of meta‐analyses of randomized controlled trials.	2017	Broad	Not reported	Psychotherapy (cognitive behavioural therapy, mixed types of psychotherapies, and other types of psychotherapies)	Anxiety related outcomes, cognitive related outcomes, depression related outcomes, depression and anxiety related outcomes, eating disorders related outcomes, disease-related physical outcomes (e.g., mortality), disease-specific distress related outcomes (e.g., depressive symptoms in somatic patients), metabolic disorders related outcomes (e.g., glycaemic control in diabetes), pain-related outcom…	Dragioti E, Karathanos V, Gerdle B, Evangelou E.	No		Non-targeted	No
Mental and behavioural disorders	Antipsychotic drugs for schizophrenia	2 (Ribeiro and David)	Efficacy and safety of aripiprazole for the treatment of schizophrenia: An overview of systematic reviews.	2018	Narrow	Patients with schizophrenia or other types of schizophrenialike psychoses (e.g., schizophreniform and schizoaffective disorders)	Aripiprazole	Symptom severity (PANSS), EPSE, anxiety, agitation, akathisia, dystonia, and parkinsonism, along with metabolic changes (weight gain and changes in glucose and cholesterol levels)	Ribeiro EL, de Mendonça Lima T, Vieira ME, Storpirtis S, Aguiar PM.	No			No
Mental and behavioural disorders	Antipsychotic drugs for schizophrenia		Treatment for negative symptoms in schizophrenia: a comprehensive review.	2017	Broad	Acutely ill patients or chronically ill patients stable on medication with a schizophrenia spectrum disorder	Aripiprazole, antidepressants (misulpride, Aripiprazole, Clozapine, Olanzapine, Quetiapine, Risperidone, Sertindole, Ziprasidone, Zotepine) or topiramate, antipsychotic medication, music therapy and exercise	Relief of predominant persistent negative symptoms or negative symptoms as primary or secondary outcome	Veerman SR, Schulte PF, de Haan L.	No		Targeted population	No
Mental and behavioural disorders	Antipsychotic drugs for schizophrenia	2 (Veerman and David)	Depot antipsychotic medication in the treatment of patients with schizophrenia: (1) meta-review; (2) patient and nurse attitudes.	2001	Broad	Patients with schizophrenia or other types of schizophrenialike psychoses (e.g., schizophreniform and schizoaffective disorders)	Depot antipsychotic medications (e fluphenazine, haloperidol, zuclopenthixol, risperidone, pimozide, trifluoperazine, zuclopenthixol, and olanzapine)	Symptoms severity, prevention of relapses, adverse effects of treatment	David AS, Adams C.	No		Targeted population	No
Mental and behavioural disorders	Pharmacological treatments for major depressive disorder	2	Meta-review on short-term effectiveness and safety of antidepressants for depression: an evidence-based approach to inform clinical practice.	2007	Broad	Patients in the acute phase treatment of depression	Short-term pharmacologic interventions with antidepressant drugs ((SSRIs, bupropion, duloxetine, mirtazapine, and venlafaxine)	Response, adverse events	Cipriani A, Geddes JR, Furukawa TA, Barbui C.	No		Targeted population	No
Mental and behavioural disorders	Pharmacological treatments for major depressive disorder		Management of first depression or generalized anxiety disorder episode in adults in primary care: A systematic metareview.	2017	Broad	Adult patients in primary care presenting a first major depression disorder (excluding bipolar disease) or a GAD episode	Antidepressants and potential associated drugs prescribed for a first depression (excluding bipolar onset) or a GAD episode, with any complementary health care in parallel of these prescriptions.	Response, discontinutation and adverse drug reactions	Driot D, Bismuth M, Maurel A, Soulie-Albouy J, Birebent J, Oustric S, et al.	No		Non-targeted	No
Mental and behavioural disorders	Pharmacological and non-pharmacological treatments for depression	2 (with Catalan-Matamoros)	Pharmacological and non-pharmacological treatments for major depressive disorder: review of systematic reviews.	2017	Broad	Adult (18 years and above) patients of all races and ethnicities with major depressive disorder (MDD) who are undergoing first-step treatment during acute treatment phase	Somatic treatments: •Any physical exercise, •Light therapy, •Tai Chi/Qigong, •Yoga CAM therapies: •Other CAM therapies used for the treatment of depression (eg, acupuncture), •Dietary supplements (eg, S-adenosyl-L-methionine (SAMe), omega-3 fatty acids), •Herbal remedies (eg, St John’s wort, Chinese herbal formulations) Individual psychological and behavioural interventions: •Behaviour therapy/be…	Response, change of depression scores, adverse events (safety and tolerability): overall discontinuation, discontinuation because of adverse events	Gartlehner G, Wagner G, Matyas N, Titscher V, Greimel J, Lux L, Gaynes BN, Viswanathan M, Patel S, Lohr KN.	No		Targeted population	No
Mental and behavioural disorders	Pharmacological and non-pharmacological treatments for depression		Exercise improves depressive symptoms in older adults: an umbrella review of systematic reviews and meta-analyses	2016	Narrow	Adults aged >60 years with a formal diagnosis using standardized Diagnostic and Statistical Manual (DSM) or the International Classification of Disease (ICD) criteria and/or individuals with elevated levels of depressive symptoms diagnosed by clinician-based or self-report depression symptom questionnaires using a recognized threshold	Interventions limited to solely physical activity	Response as measured with a depressive symptom checklist namely, the Center for Epidemiologic Studies Depression Scale (CES-D) and the Geriatric Depression Scale (GDS)	Catalan-Matamoros D, Gomez-Conesa A, Stubbs B, Vancampfort D.	No			No
Mental and behavioural disorders	Pharmacological and non-pharmacological treatments for depression	2 (with Gartlehner)	Acupuncture for depression? A systematic review of systematic reviews.	2011	Narrow	Undifferentiated depression	Acupuncture	Response	Ernst E, Lee MS, Choi TY.	No			No
Mental and behavioural disorders	Ginkgo biloba for dementia	2	Effects of Ginkgo biloba on dementia: An overview of systematic reviews	2017	Narrow	People with dementia or cognitive impairment	Ginkgo biloba extract (GbE)	Cognitive performance, activities of daily living, and clinical global impression	Yuan Q, Wang CW, Shi J, Lin ZX.	No			No
Mental and behavioural disorders	Ginkgo biloba for dementia		Ginkgo biloba compared with cholinesterase inhibitors in the treatment of dementia: a review based on meta-analyses by the cochrane collaboration.	2004	Broad	Patients with any type of dementia and unspecified cognitive impairment	Ginkgo biloba extract (GbE), donepezil, rivastigmine and galantamine	Cognitive function, patients discontinuing trials	Kurz, A. and Van Baelen, B.	No		Non-targeted	No
Nervous system diseases	Non-pharmacological interventions for insomnia	2	Review of systematic reviews about the efficacy of non-pharmacological interventions to improve sleep quality in insomnia.	2009	Broad	Adults and elderly populations (18+) with primary, secondary or comorbid (chronic) insomnia	Cognitive and behavioural interventions, relaxation-improving interventions, sleep–wake rhythm control, miscellaneous interventions (including acupuncture, accupressure, aromatherapy)	Sleep quality including sleep duration and sleep latency	Niet GJD, Tiemens BG, Kloos MW, Hutschemaekers GJM	No	No	Targeted population	No
Nervous system diseases	Non-pharmacological interventions for insomnia		Acupuncture for insomnia? An overview of systematic reviews.	2011	Narrow	Insomnia patients	Acupuncture	Total sleep duration, increased sleep duration, Pittsburgh Sleep Quality Index (PSQI) scores, Index of Severity of Insomnia, Sleep Quality, other validated score, adverse effects	Ernst E, Lee MS, Choi TY.	No	No		No
Symptoms, signs and abnormal clinical and laboratory findings, not elsewhere classified	Spinal manipulation	3	Systematic reviews of spinal manipulations for headaches: an attempt to clear up the confusion.	2011	Narrow	Patients with any type of headache (including migraine)	Spinal manipulation	Pain	Posadzki P, Ernst E.	Yes			No
Symptoms, signs and abnormal clinical and laboratory findings, not elsewhere classified	Spinal manipulation		Is spinal manipulation effective for pain? An overview of systematic reviews.	2012	Broad	Patients with pain	Spinal manipulation (chiropractic or osteopathic manipulations, manual therapy or any type of spinal manipulation)	Pain (any type)	Posadzki P.	Yes		Targeted intervention	No
Symptoms, signs and abnormal clinical and laboratory findings, not elsewhere classified	Spinal manipulation		Spinal manipulation: an update of a systematic review of systematic reviews	2011	Broad	Patients with any type of clinical condition (specifically low back pain, headache, neck pain, asthma, musculoskeletal conditions, non-musculoskeletal conditions, fibromyalgia, infant colic, any medical problem, any paediatric conditions, carpal tunnel syndrome, cervicogenic dizziness, dysmenorrhoea, gastrointestinal problems, hypertension, idiopathic scoliosis, lateral epicondylitis, lower extre…	Spinal manipulation	Pain	Posadzki P, Ernst E.	Yes	Yes of a 2006 overview	Targeted intervention	No
Symptoms, signs and abnormal clinical and laboratory findings, not elsewhere classified	Spinal manipulation		A critical review of reviews on the treatment of chronic low back pain. [non-surgical]	2001	Broad	Adults (18–65 years of age) who have chronic nonspecific low back pain, defined as disabling low back pain of equal to or greater than 3 months duration, without specific detectable cause, such as infection, neoplasm, metastasis, osteoporosis, rheumatoid arthritis, fracture, inflammatory process or radicular syndrome	Physical treatments (spinal manipulation, acupuncture, exercise, laser, orthoses, TENS, traction); drugs (NSAIDS, opioids, muscle relaxants, analgesics, antidepressants); education/behavior (back schools, EMG biofeedback, cognitive/behavioural, couple therapy. multidisciplinary teams)	Low back pain	Furlan, A. D., Clarke, J., Esmail, R., Sinclair, S., Irvin, E. and Bombardier, C.	No		Targeted population	No
Symptoms, signs and abnormal clinical and laboratory findings, not elsewhere classified	Acupuncture for pain	3	Acupuncture for pain: an overview of Cochrane reviews.	2011	Broad	Patients with any type of pain (specifically migrane, tension-type headache, peripheral joint osteoarthritis, neck disorder, rheumatoid arthritis, shoulder pain, low back pain, and lateral elbow pain)	Any type of acupuncture	Pain	Lee MS, Ernst E.	Yes		Targeted intervention	No
Symptoms, signs and abnormal clinical and laboratory findings, not elsewhere classified	Acupuncture for pain		Acupuncture: does it alleviate pain and are there serious risks? A review of reviews.	2011	Broad	Patients with dysmenorrhoea, temporomandibular joint pain, migraine, rheumatoid arthritis, tension headache, low back pain, osteoarthritis, fibromyalgia, herpes zoster, neck pain, postoperative pain, cancer pain, migraine prophylaxis, musculoskeletal pain, shoulder pain, surgical pain, chronic headache, ankylosing spondylitis, cervical spondylosis, frozen shoulder, intervertebral disk displacemen…	Acupuncture	Pain, adverse events	Ernst E, Lee MS, Choi TY.	Yes		Targeted intervention	No
Symptoms, signs and abnormal clinical and laboratory findings, not elsewhere classified	Acupuncture for pain	2	Acupuncture for chronic pain: is acupuncture more than an effective placebo? A systematic review of pooled data from meta‐analyses.	2010	Broad	Patients with low back pain, knee pain, or headache	Acupuncture	Chronic pain	Hopton A, MacPherson H.	No		Targeted intervention	No
Symptoms, signs and abnormal clinical and laboratory findings, not elsewhere classified	Acupuncture for pain		Complementary and alternative medicine for cancer pain: an overview of systematic reviews.	2014	Broad	Patients diagnosed with any cancer	Psychoeducational interventions, music interventions, acupuncture plus drug therapy, Chinese herbal medicine plus cancer therapy, compound kushen injection, reflexology, lycopene, TENS, qigong, cupping, cannabis, Reiki, homeopathy (Traumeel), creative arts therapies, acupuncture (versus drug therapy or shame acupuncture), massage therapy, transcutaneous electric nerve stimulation (TENS), and Visc…	Cancer pain	Bao Y, Kong X, Yang L, Liu R, Shi Z, Li W, Hua B, Hou W.	No		Non-targeted	No
Symptoms, signs and abnormal clinical and laboratory findings, not elsewhere classified	Acupuncture for pain	2	Effectiveness of Chinese herbal medicine for cancer palliative care: overview of systematic reviews with meta-analyses.	2015	Broad	Not reported	Chinese herbal medicines	Pain, quality of life, nutritional status, survival, chemotherapy and/or radiotherapy related toxicities, and serious adverse effects (e.g. nausea and vomiting)	Chung VC, Wu X, Hui EP, Ziea ET, Ng BF, Ho RS, Tsoi KK, Wong SY, Wu JC.	No		Targeted population	No
Symptoms, signs and abnormal clinical and laboratory findings, not elsewhere classified	Over-the-counter analgesics for pain	3	Overview review: Comparative efficacy of oral ibuprofen and paracetamol (acetaminophen) across acute and chronic pain conditions.	2015	Broad	Patients with acute post-operative pain, dysmenorrhoea, tension-type headache, migraine, osteoarthritis and rheumatoid arthritis, back pain, cancer and paediatric pain	Ibuprofen and paracetamol	≥50% pain intensity reduction, Pain free at 2 hrs, Mild or no pain at 2 hrs, Global assessment by patient	Moore RA, Derry S, Wiffen PJ, Straube S, Aldington DJ.	Yes		Targeted intervention	No
Symptoms, signs and abnormal clinical and laboratory findings, not elsewhere classified	Over-the-counter analgesics for pain		Single dose oral analgesics for acute postoperative pain in adults‐an overview of Cochrane reviews.	2015 (update of the 2011 overview)	Broad	Adults with at least moderate pain following surgery who have been given a single dose of oral analgesic	Single dose oral analgesics include 'mild' or step 1 (WHO 2010) analgesics, such as paracetamol (acetaminophen), and nonsteroidal anti‐inflammatory drugs (NSAIDs), such as ibuprofen and celecoxib, 'moderate' or step 2 analgesics, such as codeine, and 'strong' or step 3 analgesics, such as oxycodone and fentanyl.	Adverse events, serious adverse events	Moore RA, Derry S, Aldington D, Wiffen PJ.	Yes		Targeted population	No
Symptoms, signs and abnormal clinical and laboratory findings, not elsewhere classified	Over-the-counter analgesics for pain		Non‐prescription (OTC) oral analgesics for acute pain ‐ an overview of Cochrane reviews.	2015	Broad	Adults with at least moderate pain following surgery who have been given a single dose of oral analgesic	Ibuprofen, asprin, paracetamol, diclofenac potassium, naproxen	50% or greater maximum pain relief over four to six hours, success and failure rates, adverse events	Moore RA, Wiffen PJ, Derry S, Maguire T, Roy YM, Tyrrell L.	Yes		Targeted population	No
Symptoms, signs and abnormal clinical and laboratory findings, not elsewhere classified	Over-the-counter analgesics for pain	2 (Els and Moore)	Adverse events associated with medium‐and long‐term use of opioids for chronic non‐cancer pain: an overview of Cochrane Reviews.	2017	Broad	Adults with any chronic non‐cancer pain	Any opioid agent (any dose, frequency, or route of administration) used on a medium- or long-term basis for the treatment of chronic non-cancer pain in adults	Any adverse event; serious adverse event; withdrawal due to adverse events; deaths; addiction; cognitive dysfunction; constipation; depressive symptoms or other mood disturbances; hypogonadism or other endocrine dysfunction; infection; respiratory depression; sexual dysfunction; sleep apnoea or sleep-disordered breathing; xerostomia; anorexia (loss of appetite); diarrhoea; dizziness; drowsiness; …	Els C, Jackson TD, Kunyk D, Lappi VG, Sonnenberg B, Hagtvedt R, Sharma S, Kolahdooz F, Straube S.	Yes		Non-targeted	No
Symptoms, signs and abnormal clinical and laboratory findings, not elsewhere classified	Opioid use in non-cancer pain	3	Long-term opioid use in non-cancer pain	2014	Broad	Not reported	Opioid analgesics for osteoarthritis pain, neuropathic pain, and low back pain	Pain intensity, at least 50% pain relief, global improvement, subjective physical impairment, withdrawal, adverse effects, and mortality	Häuser W, Bock F, Engeser P, Tölle T, Willweber-Strumpf A, Petzke F.	No		Non-targeted	No
Symptoms, signs and abnormal clinical and laboratory findings, not elsewhere classified	Opioid use in non-cancer pain		High‐dose opioids for chronic non‐cancer pain: an overview of Cochrane Reviews.	2017	Broad	Adults with any chronic non‐cancer pain	Any opioid agent at high dose (defined as 200 mg morphine equivalent or more per day)	Pain; at least 50% pain reduction, at least 30% pain reduction, below 30/100 mm on the visual analogue pain scale, work time missed, interference with work, least 30% improvement in functional abilities, quality of life, adverse events, and withdrawals due to adverse events	Els C, Jackson TD, Hagtvedt R, Kunyk D, Sonnenberg B, Lappi VG, Straube S.	Yes		Non-targeted	No
Symptoms, signs and abnormal clinical and laboratory findings, not elsewhere classified	Opioid use in non-cancer pain		Adverse events associated with medium‐and long‐term use of opioids for chronic non‐cancer pain: an overview of Cochrane Reviews.	2017	Broad	Adults with any chronic non‐cancer pain	Any opioid agent (any dose, frequency, or route of administration) used on a medium- or long-term basis for the treatment of chronic non-cancer pain in adults	Any adverse event; serious adverse event; withdrew due to adverse events; deaths; addiction; cognitive dysfunction; constipation; depressive symptoms or other mood disturbances; hypogonadism or other endocrine dysfunction; infection; respiratory depression; sexual dysfunction; sleep apnoea or sleep-disordered breathing; xerostomia; anorexia (loss of appetite); diarrhoea; dizziness; drowsiness; fa…	Els C, Jackson TD, Kunyk D, Lappi VG, Sonnenberg B, Hagtvedt R, Sharma S, Kolahdooz F, Straube S.	Yes		Non-targeted	No
Symptoms, signs and abnormal clinical and laboratory findings, not elsewhere classified	Cannabinoids for pain, and symptoms	3 (Allan, Nielsen, Häuser)	Systematic review of systematic reviews for medical cannabinoids: Pain, nausea and vomiting, spasticity, and harms.	2018	Broad	Not reported	Cannabinoids, nabilone, Cesamet, dronabinol, Marinol, levonantradol, tetrahydrocannabinol, delta9-THC, delta-9-tetrahydrocannabinol	Pain, spasticity, and nausea and vomiting, adverse events	Allan GM, Finley CR, Ton J, Perry D, Ramji J, Crawford K, Lindblad AJ, Korownyk C, Kolber MR.	No		Targeted intervention	No
Symptoms, signs and abnormal clinical and laboratory findings, not elsewhere classified	Cannabinoids for pain, and symptoms	3	Efficacy, tolerability, and safety of cannabinoids for chemotherapy-induced nausea and vomiting—a systematic review of systematic reviews	2016	Broad	Patients presenting with any type of cancer and receiving chemotherapeutic treatment (low, moderate, or high emetic potential), independent of gender, age, country, and clinical setting	Cannabinoids, either phytocannabinoids such as herbal cannabis (hashish, marihuana), plant-based CBs (nabiximole), or pharmacological synthetic CBs (e.g., cannabidiol, dronabinol, levonantradol, nabilone)	Nausea and vomiting (acute, delayed, anticipatory, and breakthrough), frequency of nausea and vomiting (acute, delayed, anticipatory, and breakthrough), severity of nausea (acute, delayed, anticipatory, and breakthrough), withdrawal due to adverse effects, serious adverse events including deaths	Tafelski S, Häuser W, Schäfer M.	No		Targeted population	No
Symptoms, signs and abnormal clinical and laboratory findings, not elsewhere classified	Cannabinoids for pain, and symptoms		Efficacy, tolerability and safety of cannabis‐based medicines for chronic pain management–An overview of systematic reviews.	2018	Broad	Patients with chronic pain (nonmalignant and cancer pain) or spasticity in multiple sclerosis	Cannabis-based medicines, either phytocannabinoids such as herbal cannabis (hashish, marihuana), plantderived cannabinoids (dronabinol; THC/CBD = nabiximole), (synthetic) cannabinoid analogues (e.g. levonantradol, nabilone) or synthetic drugs which manipulate the endocannabinoid system, at any dose and by any route.	Chronic pain, drop-out rate due to adverse events) and/or of safety (frequency of serious adverse events)	Häuser W, Petzke F, Fitzcharles MA.	No		Non-targeted	No
Symptoms, signs and abnormal clinical and laboratory findings, not elsewhere classified	Cannabinoids for pain, and symptoms		Cannabinoid Buccal Spray for Chronic Non-Cancer or Neuropathic Pain: A Review of Clinical Effectiveness, Safety, and Guidelines	2016	Broad	Patients presenting with neuropathic pain or chronic non-cancer pain	Delta-9-tetrahydrocannabinol and cannabidiol (THC:CBD) marketed under the name Sativex® for use as a buccal spray	Chronic pain, adverse events	Canadian Agency for Drugs and Technologies in Health (CADTH)	No		Targeted intervention	No
Symptoms, signs and abnormal clinical and laboratory findings, not elsewhere classified	Cannabinoids for pain, and symptoms		The use of cannabis and cannabinoids in treating symptoms of multiple sclerosis: a systematic review of reviews.	2018	Broad	Patients with multiple sclerosis	Pharmaceutical cannabinoids such as nabiximols, nabilone and dronabinol, and plant-based cannabinoids	Disability and disability progression, pain, spasticity, bladder function, tremor/ataxia, quality of life and adverse effects	Nielsen S, Germanos R, Weier M, Pollard J, Degenhardt L, Hall W, Buckley N, Farrell M.	No		Targeted population	No
Symptoms, signs and abnormal clinical and laboratory findings, not elsewhere classified	Manual therapy for the treatment of migraine	2	Complementary and alternative medicine for the prevention and treatment of migraine headache: an overview of systematic reviews.	2015	Broad	Children and adults with migraine	Manual therapy, acupuncture and associated techniques, Alexander Technique, Ayurvedic medicine, aromatherapy, (Bach) flower remedies, biofeedback, chiropractic, herbal medicine, homeopathy, hypnosis, massage, meditation, naturopathy, osteopathy, qigong, spirituality/spiritual healing, tai chi, TCM and yoga	Intensity and duration of migraine headache	Posadzki P, AlBedah AM, Khalil MM, AlQaed MS, Lee MS, Ernst E, et al.	No		Targeted population	No
Symptoms, signs and abnormal clinical and laboratory findings, not elsewhere classified	Manual therapy for the treatment of migraine		Manual Therapeutic Interventions in Headache	2013	Broad	Not reported	Manual therapeutic techniques	Migraine, tension or cervicogenic headache	Wuttke C, Mangnus E, Kumar S	No			No
Respiratory system diseases	Acute asthma management in children	2	State of the evidence on acute asthma management in children: a critical appraisal of systematic reviews.	2007	Broad	Children (18 years of age or younger) or mixed populations with acute asthma	Anticholinergics, magnesium sulphate, heliox, theophylline, β2-agonists, Inhaled ipratropium-bromide, inhaled or oral corticosteroid, nebulizers, helium and oxygen, inhaled or intrvenous magnesium sulfate	Pulmonary function tests, hospitalization rate, length of hospitalization, ED treatment times, relapse to additional care, adverse effects, corticosteroid use, Beta2 agonist use, asthma symptoms, quality of life, vital signs, heart rate, arterial gas values, ICU admission, mechanical ventilation, costs	Boluyt N, Van der Lee JH, Moyer VA, Brand PL, Offringa M	No	No	Targeted population	No
Respiratory system diseases	Acute asthma management in children		Principal findings of systematic reviews for chronic treatment in childhood asthma.	2015	Broad	Children (1–18 years) or in a mixed population (adults and children) with recurrent wheezing or asthma who visited the ED or equivalent due to an acute asthma exacerbation	Beclomethasone dipropionate; budesonide; fluticasone propionate; inhaled corticosteroids (ICS); hydrofluoroalkane; ipratropium bromuro; long acting beta2-agonits (LABA); omalizumab; shortacting beta2-agonists (SABA)	Rate of severe exacerbations, lung function, hospital admissions, need for oral steroids (OCS), additional doses of SABA, use of additional medication, symptom scores, diurnal variation of peak expiratory flow (PEF) rate, forced volume in the first second (FEV1), or a fall of 20% in FEV1, forced vital capacity (FVC), morning PEF, AEs, withdrawals, upper respiratory tract infections, quality of li…	Castro-Rodriguez JA, Rodrigo GJ, Rodriguez-Martinez CE	No	No	Targeted population	No
Respiratory system diseases	Chronic treatment in childhood asthma	2	Safety of regular formoterol or salmeterol in children with asthma: an overview of Cochrane reviews.	2012	Broad	Children with asthma	Regular formoterol or salmeterol monotherapy or combination therapy vs placebo	All-cause mortality, non-fatal serious adverse events, asthma-related deaths, asthma-related non-fatal serious adverse events	Cates CJ, Oleszczuk M, Stovold E, Wieland LS	No	No	Targeted population	No
Respiratory system diseases	Chronic treatment in childhood asthma		Applicability of evidence from previous systematic reviews on immunotherapy in current practice of childhood asthma treatment: a GRADE (Grading of Recommendations Assessment, Development and Evaluation) systematic review.	2017	Broad	Children (6–12 years) and adolescents (>12 years) with persistent asthma and sensitisation to relevant aeroallergens (grass or tree pollen, house dust mite or combinations), with or without symptoms of allergic rhinitis.	Immunotherapy (subcutaneous or sublingual), as an add-on to usual care with daily ICS	Asthma symptoms, (severe) exacerbations, asthma control, (disease-specific) quality of life, change in FEV1	van de Griendt EJ, Tuut MK, de Groot H, Brand PL	No	No	Targeted population	No
Respiratory system diseases	Neuraminidase inhibitors for influenza	2	Safety and effectiveness of neuraminidase inhibitors for influenza treatment, prophylaxis, and outbreak control: a systematic review of systematic reviews and/or meta-analyses	2017	Broad	General population (no restrictions as long as the intervention was evaluated)	Neruaminidase inhibitors for treatment or prophylaxis	Mortality (all-cause, influenza-related and cause unspecified), hospitalization, ICU admission and pneumonia, secondary transmission of symptomatic and asymptomatic influenza, adverse events, serious adverse events	Doll MK, Winters N, Boikos C, Kraicer-Melamed H, Gore G, Quach C	No	Yes	Targeted intervention	No
Respiratory system diseases	Neuraminidase inhibitors for influenza		The value of neuraminidase inhibitors for the prevention and treatment of seasonal influenza: a systematic review of systematic reviews.	2013	Broad	Healthy adults, children, elderly and at-risk individuals	Neruaminidase inhibitors for treatment or prophylaxis	Efficacy (against laboratory-proven influenza) of prophylaxis, effectiveness in reducing the time to symptom alleviation and to a return to normal activity (as defined by the original trial protocol), the effectiveness against complications in treatment and the potential risks (adverse events)	Michiels B, Van Puyenbroeck K, Verhoeven V, Vermeire E, Coenen S	No	No	Targeted intervention	No
Respiratory system diseases	Lung cancer cost effectiveness analysis	2	Cost-effectiveness of lung cancer screening and treatment methods: a systematic review of systematic reviews. BMC health services research.	2017	Broad	Lung cancer patients	Lung cancer screening and treatments	Cost effectiveness	Azar FE, Azami-Aghdash S, Pournaghi-Azar F, Mazdaki A, Rezapour A, Ebrahimi P, Yousefzadeh N	No	No	Targeted population	No
Respiratory system diseases	Lung cancer cost effectiveness analysis		Guideline for the acquisition and preparation of conventional and endobronchial ultrasound-guided transbronchial needle aspiration specimens for the diagnosis and molecular testing of patients with known or suspected lung cancer.	2014	Broad	Patients with known or suspected lung cancer	Conventional TBNA and EBUS-guided TBNA acquisition techniques, specifimen preparation techniques, rapid on-site cytology examination (ROSE)	Quantity, quality, and yield of specimen; ability to perform molecular testing. Cost is addressed for ROSE	Van Der Heijden EH, Casal RF, Trisolini R, Steinfort DP, Hwangbo B, Nakajima T, Guldhammer-Skov B, Rossi G, Ferretti M, Herth FF, Yung R	No	No	Targeted population	No
Respiratory system diseases	Lung cancer treatment	2	Postoperative Adjuvant Systemic Therapy in Completely Resected Non–Small-Cell Lung Cancer: A Systematic Review.	2017	Broad	Adult patients with completely resected (R0) NSCLC	Adjuvant systemic therapy with observation, another adjuvant systemic therapy, or adjuvant systemic therapy plus targeted agent	Overall survival (OS), disease-free survival, adverse events, and quality of life	Bradbury P, Sivajohanathan D, Chan A, Kulkarni S, Ung Y, Ellis PM	No	Yes	Targeted population	No
Respiratory system diseases	Lung cancer treatment		Cochrane systematic reviews of treatments for lung cancer.	2005	Broad	Patients with lung cancer	Prevention and screening, NSCLC: surgical resection, Complications of surgery, Radiotherapy, Chemotherapy, Adjuvant and management therapy, SCLC: chemotherapy, radiotherapy, prophylactic cranial irradation, Palliative care: management of symptoms, malignant pleural effusion, palliative chemotherapy and radiotherapy, superior vena cava obstruction	Effectiveness in preventing lung cancer; mortality, complications from surgery, adverse effects, relapse, quality of life	Fong KM, Yang IA, Zimmerman PV, Bowman RV	No	No	Targeted population	No
Respiratory system diseases	Treatment for multiple myeloma	2	Treatment of patients with multiple myeloma: an overview of systematic reviews.	2011	Broad	Patients with multiple myeloma	Early versus deferred treatment, chemotherapy versus melphalan plus prednisone, high-dose therapy with single autologous hematopoietic stem cell transplant versus chemotherapy, tandem versus single AHCT, thalidomide, interferon-x, bisphosphonates	Survival, response rate, disease progression, adverse events, morbidities, treatment-related mortality, Vertebral compression,	Kumar A, Galeb S, Djulbegovic B.	No		Targeted population	No
Respiratory system diseases	Treatment for multiple myeloma		Efficacy and safety of bortezomib, thalidomide, and lenalidomide in multiple myeloma: an overview of systematic reviews with meta-analyses.	2017	Broad	Patients with multiple myeloma	Bortezomib, thalidomide, and lenalidomide	Overall response, progression-free survival, adverse events (thrombosis/embolism events, peripheral neuropathy, second primary malignancies)	Aguiar PM, de Mendonça Lima T, Colleoni GW, Storpirtis S.	No		Targeted population	No
Respiratory system diseases	Mammography screening	2	World Health Organization position paper on mammography screening.	2014	Narrow	Women at average risk for breast cancer ≥ 40 years of age	Screening mammography (film or digital)	Breast cancer related mortality, quality of life, disability-adjusted life years, Overtreatment, masectomies, overdiagnosis, false positive rate, all-cause mortality	World Health Organization	No			No
Respiratory system diseases	Mammography screening		Conclusions in systematic reviews of mammography for breast cancer screening and associations with review design and author characteristics.	2017	Narrow	Women 49 years or older undergoing mammography for breast cancer	Mammography for breast cancer screening	Survival (mortality reduction), cost-effectiveness of screening for quality-of-life, over-diagnosis, false positives, unnecessary treatments, radiation cancers, anxiety or worry, and pain or discomfort	Raichand S, Dunn AG, Ong MS, Bourgeois FT, Coiera E, Mandl KD.	No			No
Respiratory system diseases	Non-pharmacological treatment for cancer-related fatigue	2	Exercise and cancer-related fatigue in adults: a systematic review of previous systematic reviews with meta-analyses.	2017	Broad	Adults 18 years of age and older with any type of cancer	Exercise (aerobic, strength or both) lasting at least 3 weeks in length	Cancer-related-fatigue	Kelley GA, Kelley KS.	No		Non-targeted	No
Respiratory system diseases	Non-pharmacological treatment for cancer-related fatigue		What does really help against cancer-related fatigue? An overview of systematic reviews.	2012	Broad	Patients with cytotoxic chemotherapy or radiotherapy	Exercise, psycho-social support	Cancer-related-fatigue	Reif K, de Vries U, Petermann F.	No		Targeted population	No
Respiratory system diseases	Acupuncture for palliative care of cancer	3	Effectiveness of acupuncture and related therapies for palliative care of cancer: overview of systematic reviews.	2015	Broad	Palliative care cancer patients	Needle acupuncture, electro-acupuncture, auricular acupuncture, single or dual channel TENS	Pain cancer related, fatigue, hot flashes, chemotherapy-induced nausea and vomiting, hiccups and irradiation-induced xerostomia, cancer-related fatigue, quality of life, functional well-being, abdominal discomfort, diarrhea, peripheral neuropathy, post-operative urinary retention, quality of life, vasomotor syndrome, recovery of gastrointestinal function.	Wu X, Chung VC, Hui EP, Ziea ET, Ng BF, Ho RS, Tsoi KK, Won g SY, Wu JC.	No		Targeted population	No
Respiratory system diseases	Acupuncture for palliative care of cancer		Cochrane systematic reviews examine P6 acupuncture-point stimulation for nausea and vomiting.	2006	Broad	Adults with postoperative and chemotherapy induced nausea and vomiting	Acupuncture point, P6, with manual acupuncture, electroacupuncture, or acupressure	Postoperative sickness, chemotherapy-induced nausea and vomiting, and pregnancy-related nausea and vomiting	Ezzo J, Streitberger K, Schneider A.	No		Targeted intervention	No
Respiratory system diseases	Acupuncture for palliative care of cancer		What is the evidence for the use of acupuncture as an intervention for symptom management in cancer supportive and palliative care: an integrative overview of reviews.	2013	Broad	Adults with supportive or palliative care cancer	Acupuncture for symptom management for cancer (including acupuncture point P6)	Chemotherapy-induced nausea and vomiting, pain, radiation-induced xerostomia, hot flushes, fatigue, chemotherapy-induced leucopenia, lymphoedema, dyspnoea	Towler P, Molassiotis A, Brearley SG.	No		Targeted intervention	No
Respiratory system diseases	Interventions for improving patient quality of life	2	Review of systematic reviews of non-pharmacological interventions to improve quality of life in cancer survivors.	2017	Broad	Adults (18+) living with and beyond cancer	Physical, psychological or behavioural, multidimensional rehabilitation and online approaches, yoga, physical exercise, cognitive behavioural therapy, and mindfulness-based stress reduction programmes	Quality of life	Duncan M, Moschopoulou E, Herrington E, Deane J, Roylance R, Jones L, Bourke L, Morgan A, Chalder T, Thaha MA, Taylor SC.	No		Non-targeted	No
Respiratory system diseases	Interventions for improving patient quality of life		The effectiveness of integrated care interventions in improving patient quality of life (QoL) for patients with chronic conditions. An overview of the systematic review evidence.	2017	Broad	Adults undergoing management of one or more chronic conditions (hypertension, depression, diabetes, coronary heart condition, stroke, transient ischaemic attack (TIA), chronic obstructive pulmonary condition (COPD), cancer, heart failure, dementia and arthritis)	Integrated service models (case management, chronic care model, discharge management, multidisciplinary teams, complex interventions, primary vs. secondary care follow-up, and self-management)	Quality of life	Flanagan S, Damery S, Combes G.	No		Non-targeted	No
Musculoskeletal system and connective tissue diseases	Hip fracture pre-op management and rehabilitation	2	Hip fracture management, before and beyond surgery and medication: a synthesis of the evidence.	2011	Broad	Patient with a hip fracture from injury to secondary prevention	Pre-hospital care, pain management, multidisciplinary rehabilitation and secondary prevention strategies	Morbidity, mortality, rates of discharge and falls, bone mineral density	O’Malley, N., Blauth, M., Suhm, N. & Kates, S.	No		Targeted population	No
Musculoskeletal system and connective tissue diseases	Hip fracture pre-op management and rehabilitation		An umbrella review of clinical practice guidelines for the management of patients with hip fractures and a synthesis of recommendations for the pre-operative period.	2018	Broad	Patients with hip fractures	Pre-operative management strategies	Pain management, timing of surgery, expedited patient management, Identification and treatment of correctable co-morbidities,	Filiatreault S, Hodgins M, Witherspoon R.	No		Targeted population	No
Musculoskeletal system and connective tissue diseases	Pharmacologic treatment of low back pain	3	Medications for acute and chronic low back pain: a review of the evidence for an American Pain Society/American College of Physicians clinical practice guideline.	2007	Broad	Patients with low back pain	Dual therapy or monotherapy with 1 or more of: acetaminophen, nonsteroidal anti-inflammatory drugs (NSAIDs), antidepressants, benzodiazepines, antiepileptic drugs, skeletal muscle relaxants, opioid analgesics, tramadol, and systemic corticosteroids	Pain, back-specific function, general health status, work disability, or patient satisfaction	Chou R, Huffman LH.	Yes (Chou 2010)		Targeted population	No
Musculoskeletal system and connective tissue diseases	Pharmacologic treatment of low back pain		Pharmacologic management of chronic low back pain: synthesis of the evidence.	2011	Broad	Adults with chonic lower back pain with cenralised or radiating pain	Oral pharmacotherapy, nonsteroidal anti-inflammatory drugs, opioids, antidepressants	Pain, physical function, quality of life, adverse events	White AP, Arnold PM, Norvell DC, Ecker E, Fehlings MG.	No		Targeted population	No
Musculoskeletal system and connective tissue diseases	Pharmacologic treatment of low back pain		A critical review of reviews on the treatment of chronic low back pain.	2001	Broad	Adults (18–65 years of age) who have chronic nonspecific low back pain, defined as disabling low back pain of equal to or greater than 3 months duration, without specific detectable cause, such as infection, neoplasm, metastasis, osteoporosis, rheumatoid arthritis, fracture, inflammatory process or radicular syndrome	Drugs (NSAIDS, opioids, muscle relaxants, analgesics, antidepressants); education/behavior (back schools, EMG biofeedback, cognitive/behavioural, couple therapy. Multidisciplinary teams); and physical treatments (acupuncture, exercise, laser, orthoses, spinal manipulation, TENS, traction)	Low back pain	Furlan, A. D., Clarke, J., Esmail, R., Sinclair, S., Irvin, E. and Bombardier, C.	No		Targeted population	No
Musculoskeletal system and connective tissue diseases	Pharmacological, non-pharmacological, and surgical treatments of low back disorders	4	Low back pain (chronic)	2010	Broad	Not reported	Oral drug treatments (NSAIDS, opioids, muscle relaxants, analgesics, antidepressants), injection therapy (epidural or facet-joint corticosteroid injections, local injections), non-drug treatments (exercise, Intensive multidisciplinary treatment, acupuncture, back schools, behavioural therapy, and spinal manipulation, massage, EMG biofeedback, lumbar supports), non-surgical and surgical treatments…	Low back pain	Chou R	Yes (Chou et al 2007)		Targeted population	No
Musculoskeletal system and connective tissue diseases	Pharmacological, non-pharmacological, and surgical treatments of low back disorders		The evidence on surgical interventions for low back disorders, an overview of systematic reviews.	2013	Broad	Patients with disc herniation, spondylolisthesis, stenosis, and degenerative disc disease	fusion surgery, intradiscal electrothermal therapy, radiofrequency denervation, disc replacement, chemonucleolysis, surgical discectomy, microdiscectomy, automated percutaneous discectomy	Pain, functional status, recovery	Jacobs WC, Rubinstein SM, Willems PC, Moojen WA, Pellisé F, Oner CF, Peul WC, van Tulder MW.	No		Non-targeted	No
Musculoskeletal system and connective tissue diseases	Pharmacological, non-pharmacological, and surgical treatments of low back disorders		Effectiveness of multidisciplinary programmes for clinical pain conditions: An umbrella review.	2018	Broad	Not reported	Multimodal/multidisciplinary rehabilitation programmes comprising a lengthy, biopsychosocial treatment framework, which generally contains a synchronized combination of physical, educational or psychological treatments provided by a team of different professionals	Whiplash-associated disorders, chronic low back pain, chronic neck pain, chronic spinal pain; widespread pain; fibromyalgia syndrome; low back pain	Dragioti E, Evangelou E, Larsson B, Gerdle B, Medicinska fakulteten, Region Östergötland, et al.	No		Non-targeted	No
Musculoskeletal system and connective tissue diseases	Pharmacological, non-pharmacological, and surgical treatments of low back disorders		Systematic reviews of physical and rehabilitation medicine Cochrane contents. Part 1. Disabilities due to spinal disorders and pain syndromes in adults.	2013	Broad	Patients with spinal disorders or pain syndromes	Exercise, education and prevention, multimodal rehabilitation, physical modalities, manual therapies, reflex therapies, assistive devices, drugs	Back pain or neck pain	Negrini S, Imperio G, Villafane JH, Negrini F, Zaina F. S	No		Non-targeted	No
Musculoskeletal system and connective tissue diseases	Surgical treament of low back pain	2 (Martins and Jacobs)	Quality assessment of systematic reviews for surgical treatment of low back pain: an overview.	2016	Broad	Patients with degenerative Disk Disease, Spondylolisthesis, Lumbar Stenosis, Lumbar Disk Herniation, Spondylosis, and Facet Joint Syndrome	Injections, direct repair of the pars, arthroplasty, decompression, nucleoplasty, endoscopic discectomy, “surgery” and fusion	Disability score, function, pain, estimated blood loss, fusion rate, infection, operation time, complications, reoperation, and return to work	Martins DE, Astur N, Kanas M, Ferretti M, Lenza M, Wajchenberg M.	No		Non-targeted	No
Musculoskeletal system and connective tissue diseases	Surgical treament of low back pain		The evidence on surgical interventions for low back disorders, an overview of systematic reviews.	2013	Broad	Patients with disc herniation, spondylolisthesis, stenosis, and degenerative disc disease	fusion surgery, intradiscal electrothermal therapy, radiofrequency denervation, disc replacement, chemonucleolysis, surgical discectomy, microdiscectomy, automated percutaneous discectomy	Pain, functional status, recovery	Jacobs WC, Rubinstein SM, Willems PC, Moojen WA, Pellisé F, Oner CF, Peul WC, van Tulder MW.	No		Non-targeted	No
Musculoskeletal system and connective tissue diseases	Surgical treament of low back pain	2 (Aneiba and van Tulder)	Artificial Disc Replacement versus Fusion in the Cervical Spine: A Systematic Review of Systematic Reviews	2014	Narrow	Patients undergoing cervical spine repair	Artifical disc replacement vs fusion	Pain, neurological pain, rate of secondary operation, disability, quality of life, operative time and blood loss	Aneiba KM, Tashani OA. A	No			No
Musculoskeletal system and connective tissue diseases	Surgical treament of low back pain		Outcome of invasive treatment modalities on back pain and sciatica: an evidence-based review.	2006	Broad	Patients with back pain and sciatica	Surgical treatments (fusion surgery, intradiscal electrothermal therapy, radiofrequency denervation, disc replacement, chemonucleolysis, surgical discectomy, microdiscectomy, automated percutaneous discectomy), and injection therapy (anaesthetics and/or steroids, epidural or facet-joint corticosteroid injections, prolotherapy (sclerosant injections), trigger point injections, intradiscal injectio…	Low back pain, sciatica, fusion rates, progression of spondylolisthesis duration of sick leave, and re-operation rates	van Tulder MW, Koes B, Seitsalo S, Malmivaara A.	No		Non-targeted	No
Musculoskeletal system and connective tissue diseases	Rotator cuff repair surgery rehabilitation	2	Early Versus Delayed Motion After Rotator Cuff Repair: A Systematic Review of Overlapping Meta-analyses.	2017	Narrow	Patients who underwent rotator cuff repair	Early (same day postsurgery to 4 weeks in the early management) versus delayed motion	Range of motion; forward flexion; external rotation; strength; imaging-based tendon healing; retear rate; pain, functional improvements	Houck DA, Kraeutler MJ, Schuette HB, Mccarty EC, Bravman JT.	No			No
Musculoskeletal system and connective tissue diseases	Rotator cuff repair surgery rehabilitation		Effectiveness of early compared with conservative rehabilitation for patients having rotator cuff repair surgery: an overview of systematic reviews.	2018	Narrow	Patients who underwent rotator cuff repair	Early (1 day ost surgery) verses conservative rehabilitation	Range of motion, pain, functional status and retear rates	Mazuquin BF, Wright AC, Russell S, Monga P, Selfe J, Richards J.	No			No
Musculoskeletal system and connective tissue diseases	Complementary and alternative procedures for fibromyalgia	3	An overview of systematic reviews of complementary and alternative therapies for fibromyalgia using both AMSTAR and ROBIS as quality assessment tools.	2017	Broad	Participants diagnosed with fibromyalgia	Acupuncture, homoeopathy, spinal manipulation and herbal medicine (topical Capsicum)	Pain and adverse events	Perry R, Leach V, Davies P, Penfold C, Ness A, Churchill R.	No		Targeted population	No
Musculoskeletal system and connective tissue diseases	Complementary and alternative procedures for fibromyalgia		Complementary and alternative procedures for fibromyalgia syndrome: Updated guidelines 2017 and overview of systematic review articles.	2017	Broad	Adults with fibromyalgia	Acupuncture (manual and electro acupuncture), meditative movement therapies (qi gong, tai chi and yoga), weight reduction	Pain, sleep quality, health-related quality of life, withdraw, and adverse events	Langhorst J, Heldmann P, Henningsen P, Kopke K, Krumbein L, Lucius H, Winkelmann A, Wolf B, Haeuser W.	No		Targeted population	No
Musculoskeletal system and connective tissue diseases	Complementary and alternative procedures for fibromyalgia		An overview of systematic reviews of complementary and alternative medicine for fibromyalgia.	2012	Broad	Patients with fibromyalgia	Acupuncture, chiropractic, homoeopathy, hydrotherapy and massage	Pain, function, quality of life, work-related measures, health care consumption and costs, patient satisfaction, adverse events, emotional, mood or depression	Terry R, Perry R, Ernst E.	No		Targeted population	No
Musculoskeletal system and connective tissue diseases	Pysiotherapy and exercise	2	Physiotherapy, occupational therapy and physical therapy in fibromyalgia syndrome: Updated guidelines 2017 and overview of systematic review articles	2017	Broad	Patients with fibromyalgia	Physiotherapy, occupational therapy and physical therapy (chiropractic, laser therapy, magnetic field therapy, massage and transcranial magnetic stimulation), low to moderate intensity endurance exercise and strength training exercise	Efficacy, risks, patient preferences and applicability of available therapies	Winkelmann A, Bork H, Brückle W, Dexl C, Heldmann P, Henningsen P, Krumbein L, Pullwitt V, Schiltenwolf M, Häuser W.	No		Targeted population	No
Musculoskeletal system and connective tissue diseases	Pysiotherapy and exercise		Exercise for adults with fibromyalgia: an umbrella systematic review with synthesis of best evidence.	2014	Broad	Adults with fibromyalgia	Exercise (aerobic, resistance, aquatics, Qigong, yoga)	Pain, multidimensional function (wellness or quality of life), physical function (self-reported physical function or measured physical fitness) and adverse effects	Bidonde J, Jean Busch A, Bath B, Milosavljevic S.	No		Targeted population	No
Musculoskeletal system and connective tissue diseases	Therapy for fibromyalgia syndrome	2 (Sommer and Thieme)	Evidenced-based guidelines on the treatment of fibromyalgia patients: Are they consistent and if not, why not? Have effective psychological treatments been overlooked?.	2017	Broad	Patients of all ages with fibromyalgia	Pharmacological therapy (amitriptyline, selective serotonin reuptake inhibitors, and serotonin and norepinephrine reuptake inhibitors), exercise, cognitive-behavioral therapy, physical therapy, education/counseling, complementary and alternative treatment	Pain, fatigue, sleep, and daily functioning	Thieme K, Mathys M, Turk DC.	No		Targeted population	No
Musculoskeletal system and connective tissue diseases	Therapy for fibromyalgia syndrome		[Drug therapy for fibromyalgia syndrome: Updated guidelines 2017 and overview of systematic review articles]	2017	Broad	Patients with fibromyalgia	Amitriptyline, duloxetine, pregabalin, duloxetine, opioids	Pain, sleep problems, fatigue, quality of life, withdraws, adverse effects	Sommer C, Alten R, Bär KJ, Bernateck M, Brückle W, Friedel E, Henningsen P, Petzke F, Tölle T, Üçeyler N, Winkelmann A.	No		Targeted population	No
Musculoskeletal system and connective tissue diseases	Cupping	2	Is Cupping an Effective Treatment? An Overview of Systematic Reviews.	2011	Broad	Patients with any condition (specifically pain syndrome, stroke rehabilitation, hypertension, musculoskeletal pain, and herpes zoster	Cupping as a symptomatic treatment	Pain, and unclear outcomes of effectiveness	Lee MS, Kim J-I, Ernst E.	No		Targeted intervention	No
Musculoskeletal system and connective tissue diseases	Cupping		An overview of systematic reviews of clinical evidence for cupping therapy.	2015	Broad	Patients with any condition (specifically pain-related conditions [herpes zoster, low back pain, cancer pain, brachialgia paraesthetica nocturna, acute trigeminal neuralgia, headache, postapoplectic shoulder-hand syndrome, carpal tunnel syndrome, neck pain, osteoarthritis, shoulder pain, scapulohumeral periathritis, and ankle sprain], acne, facial paralysis, hypertension, stroke rehabilitation, a…	Cupping (wet cupping therapy [also called bleeding cupping during which small incisions are made to induce slight bleeding before applying cupping], retained cupping)	Adverse events (hematoma and pain at the treated site, increasing local pain or tingling), pain intensity,	Cao H, Han M, Zhu X, Liu J.	No		Targeted intervention	No
Musculoskeletal system and connective tissue diseases	Management of hip and knee osteoarthritis	2 (Zhang and Newberry)	OARSI recommendations for the management of hip and knee osteoarthritis, part I: critical appraisal of existing treatment guidelines and systematic review of current research evidence.	2007	Broad	Not reported	Non-pharmacological (Self-management, Telephone, Education, Strengthening, Aerobic, Water-based exercise, Balneotherapy, Spa/sauna, Weight reduction, Nutrients (e.g., SAM-e), TENS, Laser, Ultrasound, Radiotherapy, Heat/ice, Massage, Acupuncture, Insoles, Cane/stick, Joint protection (braces), Electrotherapy/EMG, Referral), pharmacological (Acetaminophen, NSAIDs, NSAIDs + PPIs, NSAIDs + H2 blocker…	Pain, function, percentage of patients with moderate to excellent (or more than 50%) pain relief or symptomatic improvement, prevalent or incident risk of side effects, surgical modalities of treatment such as total joint replacement and osteotomy, structural progression of disease	Zhang W, Moskowitz RW, Nuki G, Abramson S, Altman RD, Arden N, Bierma-Zeinstra S, Brandt KD, Croft P, Doherty M, Dougados M.	No		Non-targeted	No
Musculoskeletal system and connective tissue diseases	Management of hip and knee osteoarthritis		Treatment of Osteoarthritis of the Knee: An Update Review (Update of "Analgesics for osteoarthritis: an update of the 2006 comparative effectiveness review[2011]")	2017	Broad	Adults (age 18 or over) with a diagnosis of osteoarthritis of the knee, as defined by the American Academy of Orthopaedic Surgeons	Cell-based therapies; glucosamine, chondroitin, or glucosamine plus chondroitin; strength training, agility, or aerobic exercise (land or water based); balneotherapy, mud bath therapy; electrical stimulation techniques (including TENS, neuromuscular electrical stimulation, and pulsed electromagnetic field therapy [PEMF]); whole body vibration; heat, infrared, or ultrasound; orthoses (knee braces,…	Pain, function, and quality of life	Newberry SJ, FitzGerald J, SooHoo NF, Booth M, Marks J, Motala A, Apaydin E, Chen C, Raaen L, Shanman R, Shekelle PG	No		Targeted population	No
Musculoskeletal system and connective tissue diseases	Non-pharmacological interventions for osteoarthritis	2 (Zhang and Moe)	Effectiveness of nonpharmacological and nonsurgical interventions for hip osteoarthritis: an umbrella review of high-quality systematic reviews.	2007	Broad	People with a diagnosis of osteoarthritis of the hip, as defined by the American Academy of Orthopaedic Surgeons	Acupuncture, herbal therapy, diacerein, exercise	Pain, function and stiffness	Moe RH, Haavardsholm EA, Christie A, Jamtvedt G, Dahm KT, Hagen KB.	No		Targeted population	No
Musculoskeletal system and connective tissue diseases	Non-pharmacological interventions for osteoarthritis		Complementary and alternative medicine for rheumatoid arthritis and osteoarthritis: an overview of systematic reviews.	2011	Broad	Patients with osteoarthritis and rheumatoid arthritis	Acupuncture/acupressure, Alexander Technique, aromatherapy, (Bach) flower remedies, chiropractic, herbal medicine, homeopathy, hypnosis, massage of any form, naturopathy, osteopathy, spiritual healing, Tai Chi, Traditional Chinese Medicine, and yoga	Pain, swelling, stiffness, function, range of motion, disease activity, and trait anxiety at post-treatment and 6-month follow-up, mobility, coordination, and self-care	Ernst E, Posadzki P.	No		Non-targeted	No
Musculoskeletal system and connective tissue diseases	Non-pharmacological interventions for osteoarthritis	2 (Ernst and Yang)	Traditional Chinese medicine for knee osteoarthritis: An overview of systematic review.	2017	Broad	Patients diagnosed with knee OA, at any severity, which were either (1) diagnosed by the American College of Rheumatology (ACR) criteria, (2) Chinese Medical Association criteria, (3) or European League against Rheumatism (EULAR) criteria	Acupuncture, electroacupuncture, Chinese herbal treatment, moxibustion, Tai Chi, Qigong, Chinese herbal bath, and massage.	All-cause mortality, recovery, and disability events; pain, physical function, and patients’ global assessment, which were specified in the Outcome Measures in Rheumatology Clinical Trials (OMERACT) III Conference	Yang M, Jiang L, Wang Q, Chen H, Xu G.	No		Targeted population	No
Musculoskeletal system and connective tissue diseases	Knee osteoarthritis - physical therapy	2	Physical therapy interventions for patients with osteoarthritis of the knee: an overview of systematic reviews.	2008	Broad	Patients with osteoarthritis of the knee	Physical therapy interventions (acupuncture, exercise (aerobic walking or strengthening exercise), physical modalities, patient education, ultrasound, electrical muscle stimulation, thermotherapy, balneotherapy, laser therapy, TENS, weight loss, pulsed electromagnetic energy, electromagnetic fields, braces and orthoses, psychoeducational interventions)	Pain, physical function, joint tenderness, respiratory capacity, psychological outcomes (eg, scales of psychological disability or self-efficacy), exercise adherence, strength rating, quality of life	Jamtvedt G, Dahm KT, Christie A, Moe RH, Haavardsholm E, Holm I, Hagen KB.	No		Targeted population	No
Musculoskeletal system and connective tissue diseases	Knee osteoarthritis - physical therapy		Physiotherapy management of lower limb osteoarthritis.	2017	Broad	Patients with lower limb osteoarthritis	Exercise with or without self-management interventions; manual therapy, including joint mobilization and manipulation; transcutaneous electrical neuromuscular facilitation (TENS), an electrotherapeutic pain relieving device; and acupuncture	Pain severity, physical function, disability, quality of life	Walsh NE, Pearson J, Healey EL.	No		Targeted population	No
Musculoskeletal system and connective tissue diseases	Rheumatoid arthritis - nonparmacological interventions	2	Effectiveness of nonpharmacological and nonsurgical interventions for patients with rheumatoid arthritis: an overview of systematic reviews	2007	Broad	People with rheumatoid arthritis according to the American College of Rheumatology criteria or other acceptable diagnostic criteria	Nonpharmacological and nonsurgical interventions (Acupuncture, Balneotherapy, Diets, Llectrical stimulation, Herbal therapy, Occupational therapy, Advice/instruction about assistive devices, Comprehensive occupational therapy, Joint protection, Provision of splints, Training of motor function, Hand/foot orthosis, Patient educational intervention, Exercise, Low-level laser therapy, Therapeutic ult…	Pain, functional disability, and patient global assessment. The concept of “function” is based on the International Classification of Functioning, Disability and Health (ICF), where “function” is an umbrella term for body function, body structure, activities, and participation. As secondary outcome variables, we considered the rest of the outcomes in the preliminary core set recommended by the In…	Christie A, Jamtvedt G, Dahm KT, Moe RH, Haavardsholm EA, Hagen KB.	No		Targeted population	No
Musculoskeletal system and connective tissue diseases	Rheumatoid arthritis - nonparmacological interventions		The evidence base for psychological interventions for rheumatoid arthritis: A systematic review of reviews.	2018	Broad	Adult participants ≥18 years with rheumatoid arthritis	Psychological component as an adjunct to medication (Motivational interviewing, Cognitive behavioural therapy, Supportive counselling, Psychotherapy, Self-regulatory techniques, Mindfulness-based cognitive therapy, disclosure therapy)	Pain, quality of life, functional disability, psychological status and disease activity (secondary outcomes included self-efficacy, coping and self-management behaviours)	Prothero L, Barley E, Galloway J, Georgopoulou S, Sturt J.	No		Targeted population	No
Musculoskeletal system and connective tissue diseases	Rheumatoid arthritis - pharmacological interventions	2	Biologics for rheumatoid arthritis: an overview of Cochrane reviews.	2009	Broad	People with rheumatoid arthritis according to the 1987 American College of Rheumatology criteria or other acceptable diagnostic criteria	Biologic DMARDs (including abatacept, adalimumab, anakinra, etanercept, infliximab, rituximab and other biologic DMARDs) alone used in standard, approved‐doses or in combination with other biologic/traditional DMARD compared to placebo alone or to placebo plus biologic/traditional DMARD.	ACR50 defined as 50% improvement in both tender and swollen joint counts and 50% improvement in three of the five following five variables: patient global assessment, physician global assessments, pain scores, Health Assessment Questionnaire (HAQ) score, and acute phase reactants (Erythrocyte Sedimentation Rate (ESR) or C‐Reactive Protein, and withdrawl due to adverse events.	Singh JA, Christensen R, Wells GA, Suarez‐Almazor ME, Buchbinder R, Lopez‐Olivo MA, Ghogomu ET, Tugwell P.	No		Targeted population	No
Musculoskeletal system and connective tissue diseases	Rheumatoid arthritis - pharmacological interventions		Recommendations for the management of rheumatoid arthritis in the Eastern Mediterranean region: an adolopment of the 2015 American College of Rheumatology guidelines	2015	Broad	Patients with rheumatoid arthritis	Treat-to-target strategy versus a non-targeted approach, combination double DMARD therapy versus mono-DMARD therapy, combination triple traditional DMARD therapy versus mono-DMARD therapy, add versus not add long-term low-dose glucocorticoid therapy to traditional DMARDs, TNFi monotherapy versus triple DMARD therapy, TNFi + MTX therapy versus triple DMARD therapy, TNFi monotherapy versus non-TNF …	Disease activity; pain; functional ability; gastrointestinal, neurological, and pulmonary adverse events; hepatotoxicity; radiographic progression (using total Sharp score); withdrawal due to adverse events.	American College of Rheumatology guidelines	No		Targeted population	No

## Sheet: Authors duplicate
Sub-class	# overviews that duplicate	Overlapping overview titles	Authors	Same author(s)
Periodontal treatment and preterm birth rate	2	Effect of periodontal treatment on preterm birth rate: a systematic review of meta‐analyses.	López NJ, Uribe S, Martinez B.	No
Periodontal treatment and preterm birth rate		Gaps in knowledge about the association between maternal periodontitis and adverse obstetric outcomes: an umbrella review.	Vivares-Builes AM, Rangel-Rincón LJ, Botero JE, Agudelo-Suárez AA.	No
Preterm birth	3	The effectiveness of medical interventions aimed at preventing preterm birth: A literature review.	Wisanskoonwong P, Fahy K, Hastie C.	No
Preterm birth		Interventions during pregnancy to prevent preterm birth: an overview of Cochrane systematic reviews.	Medley N, Vogel JP, Care A, Alfirevic Z.	No
Preterm birth		WHO recommendations on interventions to improve preterm birth outcomes	WHO Guideline Development Group	No
Treatment of venous thromboembolism with LMWH and UFH	3	Prophylaxis and treatment of venous thromboembolism (VTE) in patients with cancer: the Saudi clinical practice guideline.	Al-Hameed F, Al-Dorzi HM, Al Momen A, Algahtani F, Al Zahrani H, Al Saleh K, Al Sheef M, Owaidah T, Alhazzani W, Neumann I, Wiercioch W	No
Treatment of venous thromboembolism with LMWH and UFH		Management of venous thromboembolism: a systematic review for a practice guideline	Segal JB, Streiff MB, Hofmann LV, Thornton K, Bass EB.	No
Treatment of venous thromboembolism with LMWH and UFH		Venous thromboembolism: advances in diagnosis and treatment	Tritschler T, Kraaijpoel N, Le Gal G, Wells PS.	No
Treatment of venous thromboembolism with LMWH and UFH	2 (with Tritschler)	Treatment of venous thromboembolism with low-molecular-weight heparin: a synthesis of the evidence published in systematic literature reviews.	Krishnan JA, Segal JB, Streiff MB, Bolger DT, Eng J, Jenckes MW, Tamariz LJ, Bass EB.	No
Periodontal treatment and glycaemic control	2	Systematic review and assessment of systematic reviews examining the effect of periodontal treatment on glycemic control in patients with diabetes.	Hasuike A, Iguchi S, Suzuki D, Kawano E, Sato S.	No
Periodontal treatment and glycaemic control		Periodontal treatment and glycaemic control in patients with diabetes and periodontitis: an umbrella review	Botero JE, Rodriguez C, Agudelo‐Suarez AA.	No
Food supplements for body weight reduction	2	Dietary supplements for body-weight reduction: a systematic review.	Pittler MH, Ernst E.	Yes	2
Food supplements for body weight reduction		Food supplements for body weight reduction: a systematic review of systematic reviews.	Onakpoya IJ, Wider B, Pittler MH, Ernst E.	Yes
Diets to reduce weight and obesity	3	Low‐carbohydrate diets for overweight and obesity: a systematic review of the systematic reviews.	Churuangsuk C, Kherouf M, Combet E, Lean M.	No
Diets to reduce weight and obesity		Improving diet and physical activity to reduce population prevalence of overweight and obesity: An overview of current evidence.	Stephens SK, Cobiac LJ, Veerman JL.	No
Diets to reduce weight and obesity		Nutritional interventions for optimizing healthy body composition in older adults in the community: an umbrella review of systematic reviews.	Schultz TJ, Roupas P, Wiechula R, Krause D, Gravier S, Tuckett A, Hines S, Kitson A.	No
Web-based interventions for weight loss	2	Web-based interventions for weight loss or weight loss maintenance in overweight and obese people: a systematic review of systematic reviews.	Sorgente A, Pietrabissa G, Manzoni GM, Re F, Simpson S, Perona S, Rossi A, Cattivelli R, Innamorati M, Jackson JB, Castelnuovo G.	No
Web-based interventions for weight loss		Mobile and Web 2.0 interventions for weight management: an overview of review evidence and its methodological quality.	Bardus M, Smith JR, Samaha L, Abraham C.	No
Childhood obesity interventions	2	Systematic review on evidence-based adolescent nutrition interventions.	Lassi, Z.S., Moin, A., Das, J.K., Salam, R.A., Bhutta, Z.A.	No
Childhood obesity interventions		How useful are systematic reviews of child obesity interventions?	Wolfenden L, Wiggers J, d'Espaignet ET, Bell AC.	No
Treatment of procedural pain in children	2	Review of systematic reviews on acute procedural pain in children in the hospital setting.	Stinson J, Yamada J, Dickson A, Lamba J, Stevens B.	No
Treatment of procedural pain in children		Interventions for postoperative pain in children: An overview of systematic reviews.	Boric K, Dosenovic S, Jelicic Kadic A, Batinic M, Cavar M, Urlic M, Markovina N, Puljak L.	No
Effects of coffee	2	Coffee, caffeine, and health outcomes: an umbrella review.	Grosso G, Godos J, Galvano F, Giovannucci EL.	No
Effects of coffee		Coffee consumption and health: umbrella review of meta-analyses of multiple health outcomes	Poole R, Kennedy OJ, Roderick P, Fallowfield JA, Hayes PC, Parkes J.	No
Promoting healthy behaviour by communicating disease risk	2	How to promote healthy behaviours in patients? An overview of evidence for behaviour change techniques.	Van Achterberg T, Huisman-de Waal GG, Ketelaar NA, Oostendorp RA, Jacobs JE, Wollersheim HC.	No
Promoting healthy behaviour by communicating disease risk		Can communicating personalised disease risk promote healthy behaviour change? A systematic review of systematic reviews.	French DP, Cameron E, Benton JS, Deaton C, Harvie M.	No
Effects of financial arrangements for health systems in low-income countries	2	Supporting the delivery of cost-effective interventions in primary health-care systems in low-income and middle-income countries: an overview of systematic reviews.	Lewin S, Lavis JN, Oxman AD, Bastías G, Chopra M, Ciapponi A, Flottorp S, Martí SG, Pantoja T, Rada G, Souza N.	Yes	2
Effects of financial arrangements for health systems in low-income countries		Financial arrangements for health systems in low‐income countries: an overview of systematic reviews.	Wiysonge CS, Paulsen E, Lewin S, Ciapponi A, Herrera CA, Opiyo N, Pantoja T, Rada G, Oxman AD.	Yes
Physical activity promotion in children and adolescents	3	a) Physical activity and mental health in children and adolescents: a review of reviews. b) Physical activity and mental health in children and adolescents: An updated review of reviews and an analysis of causality	Biddle SJ, Asare M.	Yes	2
Physical activity promotion in children and adolescents		The effect of community and family interventions on young people's physical activity levels: a review of reviews and updated systematic review.	van Sluijs EM, Kriemler S, McMinn AM.	No
Physical activity promotion in children and adolescents		Interventions designed to reduce sedentary behaviours in young people: a review of reviews.	Biddle SJ, Petrolini I, Pearson N.	Yes
Vitamin D supplementation	4	Vitamin D and multiple health outcomes: umbrella review of systematic reviews and meta-analyses of observational studies and randomised trials.	Theodoratou E, Tzoulaki I, Zgaga L, Ioannidis JP.	No
Vitamin D supplementation		Effect of vitamin D supplementation on non-skeletal disorders: a systematic review of meta-analyses and randomised trials.	Autier P, Mullie P, Macacu A, Dragomir M, Boniol M, Coppens K, Pizot C, Boniol M.	No
Vitamin D supplementation		What do Cochrane systematic reviews say about interventions for vitamin D supplementation?	Mateussi MV, Latorraca CD, Daou JP, Martimbianco AL, Riera R, Pacheco RL, Pachito DV.	No
Vitamin D supplementation		Non-skeletal health effects of vitamin D supplementation: A systematic review on findings from meta-analyses summarizing trial data.	Rejnmark L, Bislev LS, Cashman KD, Eiríksdottir G, Gaksch M, Grübler M, Grimnes G, Gudnason V, Lips P, Pilz S, Van Schoor NM.	No
Reduction interventions of alcohol intake	2	Effectiveness of brief interventions in primary health care settings to decrease alcohol consumption by adult non-dependent drinkers: a systematic review of systematic reviews.	Alvarez-Bueno C, Rodriguez-Martin B, Garcia-Ortiz L, Gómez-Marcos MÁ, Martinez-Vizcaino V.	No
Reduction interventions of alcohol intake		The impact of brief alcohol interventions in primary healthcare: a systematic review of reviews.	O'Donnell A, Anderson P, Newbury-Birch D, Schulte B, Schmidt C, Reimer J, Kaner E.	No
Reduction interventions of alcohol intake	2	Universal prevention of alcohol and drug use: An overview of reviews in an Australian context.	Mewton L, Visontay R, Chapman C, Newton N, Slade T, Kay‐Lambkin F, Teesson M.	No
Reduction interventions of alcohol intake		Population-level interventions to reduce alcohol-related harm: an overview of systematic reviews.	Martineau F, Tyner E, Lorenc T, Petticrew M, Lock K.	No
Behavioral Counseling and Pharmacotherapy Interventions for Tobacco Cessation	2 population-level overviews	Smoking cessation guidelines for health professionals: an update.	West R, McNeill A, Raw M.	No
Behavioral Counseling and Pharmacotherapy Interventions for Tobacco Cessation		Population tobacco control interventions and their effects on social inequalities in smoking: placing an equity lens on existing systematic reviews.	Main C, Thomas S, Ogilvie D, Stirk L, Petticrew M, Whitehead M, Sowden A.	No
Behavioral Counseling and Pharmacotherapy Interventions for Tobacco Cessation	5 individual-level	Behavioral Counseling and Pharmacotherapy Interventions for Tobacco Cessation in Adults, Including Pregnant Women: A Review of Reviews for the U.S. Preventive Services Task Force.	Patnode CD, Henderson JT, Thompson JH, NCBI Bookshelf.	No
Behavioral Counseling and Pharmacotherapy Interventions for Tobacco Cessation		Systematic review: smoking cessation intervention strategies for adults and adults in special populations.	Ranney L, Melvin C, Lux L, McClain E, Lohr KN.	No
Behavioral Counseling and Pharmacotherapy Interventions for Tobacco Cessation		Effectiveness of smoking cessation interventions among adults: a systematic review of reviews.	Lemmens V, Oenema A, Knut IK, Brug J.	No
Behavioral Counseling and Pharmacotherapy Interventions for Tobacco Cessation		Effectiveness of smoking cessation interventions: review of evidence and implications for best practice in Australian health care settings.	Miller M, Wood L.	No
Behavioral Counseling and Pharmacotherapy Interventions for Tobacco Cessation		Efficacy of non-pharmacological methods used for treating tobacco dependence: meta-analysis.	Bala MM, Lesniak W.	No
Pharmacological interventions for smoking cessation	2	Pharmacological interventions for smoking cessation: an overview and network meta‐analysis.	Cahill K, Stevens S, Perera R, Lancaster T.	No
Pharmacological interventions for smoking cessation		Efficacy of pharmacological methods used for treating tobacco dependence: meta-analysis.	Bała MM, Leśniak W, Strzeszyński Ł.	No
Exercise therapy	5	Exercise therapy for bone and muscle health: an overview of systematic reviews.	Hagen KB, Dagfinrud H, Moe RH, Østerås N, Kjeken I, Grotle M, Smedslund G	No
Exercise therapy		Effects of exercise on bone status in female subjects, from young girls to postmenopausal women: an overview of systematic reviews and meta-analyses	Xu J, Lombardi G, Jiao W, Banfi G.	No
Exercise therapy		Effectiveness of exercise therapy: a best-evidence summary of systematic reviews.	Smidt N, De Vet HC, Bouter LM, Dekker J	No
Exercise therapy		Exercise therapy for functional capacity in chronic diseases: an overview of meta-analyses of randomised controlled trials.	Pasanen T, Tolvanen S, Heinonen A, Kujala UM	No
Exercise therapy		Exercise prescription for hospitalized people with chronic obstructive pulmonary disease and comorbidities: a synthesis of systematic reviews.	Reid WD, Yamabayashi C, Goodridge D, Chung F, Hunt MA, Marciniuk DD, Brooks D, Chen YW, Hoens AM, Camp PG.	No
Exercise to relieve pain	4	Effectiveness of Aquatic Exercise and Balneotherapy: A Summary of Systematic Reviews Based on Randomized Controlled Trials of Water Immersion Therapies.	Kamioka H, Tsutani K, Okuizumi H, Mutoh Y, Ohta M, Handa S,	No
Exercise to relieve pain		Effectiveness of Pilates exercise in treating people with chronic low back pain: a systematic review of systematic reviews.	Wells C, Kolt GS, Marshall P, Hill B, Bialocerkowski A.	No
Exercise to relieve pain		Exercise interventions for non-specific low back pain: an overview of systematic reviews.	Swinkels A, Cochrane K, Burt A, Johnson L, Lunn T, Rees AS.	No
Exercise to relieve pain		Physical activity and exercise for chronic pain in adults: an overview of Cochrane Reviews.	Geneen LJ, Moore RA, Clarke C, Martin D, Colvin LA, Smith BH.	No
Physiotherapy exercise	2	Therapeutic exercise in physiotherapy practice is beneficial: a summary of systematic reviews 2002–2005.	Taylor NF, Dodd KJ, Shields N, Bruder A.	YEs	2
Physiotherapy exercise		Progressive resistance exercise in physical therapy: a summary of systematic reviews.	Taylor NF, Dodd KJ, Damiano DL	Yes
Exercise to relieve fatigue	2	Exercise and cancer-related fatigue in adults: a systematic review of previous systematic reviews with meta-analyses.	Kelley GA, Kelley KS.	Yes	2
Exercise to relieve fatigue		Exercise and sleep: a systematic review of previous meta‐analyses.	Kelley GA, Kelley KS	Yes
Influenza vaccination	3	Assessing the state of knowledge regarding the effectiveness of interventions to contain pandemic influenza transmission: a systematic review and narrative synthesis.	Saunders-Hastings P, Reisman J, Krewski D	No
Influenza vaccination		Effectiveness and harms of seasonal and pandemic influenza vaccines in children, adults and elderly: a critical review and re-analysis of 15 meta-analyses.	Manzoli L, Ioannidis JP, Flacco ME, De Vito C, Villari P	No
Influenza vaccination		Preventing influenza: an overview of systematic reviews.	Van der Wouden JC, Bueving HJ, Poole P.	No
Acupuncture for managing gynaecologic conditions	3	Acupuncture in obstetrics and gynecology: an overview of systematic reviews.	Ernst E, Lee MS, Choi TY	No
Acupuncture for managing gynaecologic conditions		The use of acupuncture for managing gynaecologic conditions: An overview of systematic reviews.	Kang HS, Jeong D, Kim DI, Lee MS.	No
Acupuncture for managing gynaecologic conditions		Acupuncture to treat common reproductive health complaints: An overview of the evidence.	Smith CA, Carmady B.	No
Acupuncture for management of pregnancy-related symptoms	2	Evaluation of outpatient acupuncture for relief of pregnancy‐related conditions.	Buchberger B, Krabbe L	No
Acupuncture for management of pregnancy-related symptoms		Findings and methodological quality of systematic reviews focusing on acupuncture for pregnancy-related acute conditions.	Bergamo TR, Latorraca COC, Pachito DV, Martimbianco ALC, Riera R	No
Assisted reproductive technologies (ARTs)	2	Assisted reproductive technologies (ARTs): evaluation of evidence to support public policy development	Nardelli AA, Stafinski T, Motan T, Klein K, Menon D	No
Assisted reproductive technologies (ARTs)		Assisted reproductive technology: an overview of Cochrane Reviews.	Farquhar C, Marjoribanks J	No
Lupus nephritis treatment	2	Is rituximab effective for induction of remission in lupus nephritis?.	Mac-Namara M, Rada G.	No
Lupus nephritis treatment		Treatment for lupus nephritis: an overview of systematic reviews and meta-analyses.	Chen Y, Sun J, Zou K, Yang Y, Liu G	No
Urinary incontinence	3	What do Cochrane systematic reviews say about non-surgical interventions for urinary incontinence in women?	Costa AA, Vasconcellos IM, Pacheco RL, Bella ZI, Riera R.	No
Urinary incontinence		Systematic review of systematic reviews for the management of urinary incontinence and promotion of continence using conservative behavioural approaches in older people in care homes	Roe B, Flanagan L, Maden M.	No
Urinary incontinence		Nonsurgical treatment of stress urinary incontinence (SUI): grading of evidence in systematic reviews.	Latthe PM, Foon R, Khan K.	No
Interventions to treat complex wounds	3	Systemic wound care: a meta-review of cochrane systematic reviews.	Ubbink DT, Santema TB, Stoekenbroek RM.	No
Interventions to treat complex wounds		Seeking effective interventions to treat complex wounds: an overview of systematic reviews.	Tricco AC, Antony J, Vafaei A, Khan PA, Harrington A, Cogo E, Wilson C, Perrier L, Hui W, Straus SE.	No
Interventions to treat complex wounds		An analysis of systematic reviews undertaken on standard advanced wound dressings in the last 10 years	Horkan L, Stansfield G, Miller M.	No
Nonpharmacological treatment for behavioural and psychological disturbances	4	Nonpharmacological approaches for behavioural and psychological symptoms of dementia in older adults: A systematic review of reviews.	Legere LE, McNeill S, Schindel Martin L, Acorn M, An D.	No
Nonpharmacological treatment for behavioural and psychological disturbances		Systematic review of systematic reviews of non-pharmacological interventions to treat behavioural disturbances in older patients with dementia.	Abraha I, Rimland JM, Trotta FM, Dell'Aquila G, Cruz-Jentoft A, Petrovic M, Gudmundsson A, Soiza R, O'Mahony D, Guaita A, Cherubini A.	No
Nonpharmacological treatment for behavioural and psychological disturbances		What do Cochrane systematic reviews say about non-pharmacological interventions for treating cognitive decline and dementia?	Vilela VC, Pacheco RL, Latorraca CO, Pachito DV, Riera R.	No
Nonpharmacological treatment for behavioural and psychological disturbances		Psychosocial interventions for people with dementia: a synthesis of systematic reviews.	McDermott O, Charlesworth G, Hogervorst E, Stoner C, Moniz-Cook E, Spector A, Csipke E, Orrell M.	No
Psychotherapy and non-medication-based interventions	3	Efficacy of pharmacotherapy and psychotherapy for adult psychiatric disorders: a systematic overview of meta-analyses.	Huhn M, Tardy M, Spineli LM, Kissling W, Förstl H, Pitschel-Walz G, Leucht C, Samara M, Dold M, Davis JM, Leucht S.	No
Psychotherapy and non-medication-based interventions		Cochrane Reviews of non-medication based psychotherapeutic and other interventions for schizophrenia, psychosis, and bipolar disorder: A systematic literature review.	Jung XT, Newton R.	No
Psychotherapy and non-medication-based interventions		Does psychotherapy work? An umbrella review of meta‐analyses of randomized controlled trials.	Dragioti E, Karathanos V, Gerdle B, Evangelou E.	No
Antipsychotic drugs for schizophrenia	3	Efficacy and safety of aripiprazole for the treatment of schizophrenia: An overview of systematic reviews.	Ribeiro EL, de Mendonça Lima T, Vieira ME, Storpirtis S, Aguiar PM.	No
Antipsychotic drugs for schizophrenia		Treatment for negative symptoms in schizophrenia: a comprehensive review.	Veerman SR, Schulte PF, de Haan L.	No
Antipsychotic drugs for schizophrenia		Depot antipsychotic medication in the treatment of patients with schizophrenia: (1) meta-review; (2) patient and nurse attitudes.	David AS, Adams C.	No
Pharmacological treatments for major depressive disorder	2	Meta-review on short-term effectiveness and safety of antidepressants for depression: an evidence-based approach to inform clinical practice.	Cipriani A, Geddes JR, Furukawa TA, Barbui C.	No
Pharmacological treatments for major depressive disorder		Management of first depression or generalized anxiety disorder episode in adults in primary care: A systematic metareview.	Driot D, Bismuth M, Maurel A, Soulie-Albouy J, Birebent J, Oustric S, et al.	No
Pharmacological and non-pharmacological treatments for depression	2 (with Catalan-Matamoros)	Pharmacological and non-pharmacological treatments for major depressive disorder: review of systematic reviews.	Gartlehner G, Wagner G, Matyas N, Titscher V, Greimel J, Lux L, Gaynes BN, Viswanathan M, Patel S, Lohr KN.	No
Pharmacological and non-pharmacological treatments for depression		Exercise improves depressive symptoms in older adults: an umbrella review of systematic reviews and meta-analyses	Catalan-Matamoros D, Gomez-Conesa A, Stubbs B, Vancampfort D.	No
Pharmacological and non-pharmacological treatments for depression		Acupuncture for depression? A systematic review of systematic reviews.	Ernst E, Lee MS, Choi TY.	No
Ginkgo biloba for dementia	2	Effects of Ginkgo biloba on dementia: An overview of systematic reviews	Yuan Q, Wang CW, Shi J, Lin ZX.	No
Ginkgo biloba for dementia		Ginkgo biloba compared with cholinesterase inhibitors in the treatment of dementia: a review based on meta-analyses by the cochrane collaboration.	Kurz, A. and Van Baelen, B.	No
Non-pharmacological interventions for insomnia	2	Review of systematic reviews about the efficacy of non-pharmacological interventions to improve sleep quality in insomnia.	Niet GJD, Tiemens BG, Kloos MW, Hutschemaekers GJM	No
Non-pharmacological interventions for insomnia		Acupuncture for insomnia? An overview of systematic reviews.	Ernst E, Lee MS, Choi TY.	No
Spinal manipulation	3	Systematic reviews of spinal manipulations for headaches: an attempt to clear up the confusion.	Posadzki P, Ernst E.	Yes	3
Spinal manipulation		Is spinal manipulation effective for pain? An overview of systematic reviews.	Posadzki P.	Yes
Spinal manipulation		Spinal manipulation: an update of a systematic review of systematic reviews	Posadzki P, Ernst E.	Yes
Spinal manipulation		A critical review of reviews on the treatment of chronic low back pain. [non-surgical]	Furlan, A. D., Clarke, J., Esmail, R., Sinclair, S., Irvin, E. and Bombardier, C.	No
Acupuncture for pain	3	Acupuncture for pain: an overview of Cochrane reviews.	Lee MS, Ernst E.	Yes	2
Acupuncture for pain		Acupuncture: does it alleviate pain and are there serious risks? A review of reviews.	Ernst E, Lee MS, Choi TY.	Yes
Acupuncture for pain	2	Acupuncture for chronic pain: is acupuncture more than an effective placebo? A systematic review of pooled data from meta‐analyses.	Hopton A, MacPherson H.	No
Acupuncture for pain		Complementary and alternative medicine for cancer pain: an overview of systematic reviews.	Bao Y, Kong X, Yang L, Liu R, Shi Z, Li W, Hua B, Hou W.	No
Acupuncture for pain	2	Effectiveness of Chinese herbal medicine for cancer palliative care: overview of systematic reviews with meta-analyses.	Chung VC, Wu X, Hui EP, Ziea ET, Ng BF, Ho RS, Tsoi KK, Wong SY, Wu JC.	No
Over-the-counter analgesics for pain	3	Overview review: Comparative efficacy of oral ibuprofen and paracetamol (acetaminophen) across acute and chronic pain conditions.	Moore RA, Derry S, Wiffen PJ, Straube S, Aldington DJ.	Yes	4
Over-the-counter analgesics for pain		Single dose oral analgesics for acute postoperative pain in adults‐an overview of Cochrane reviews.	Moore RA, Derry S, Aldington D, Wiffen PJ.	Yes
Over-the-counter analgesics for pain		Non‐prescription (OTC) oral analgesics for acute pain ‐ an overview of Cochrane reviews.	Moore RA, Wiffen PJ, Derry S, Maguire T, Roy YM, Tyrrell L.	Yes
Over-the-counter analgesics for pain	2 (Els and Moore)	Adverse events associated with medium‐and long‐term use of opioids for chronic non‐cancer pain: an overview of Cochrane Reviews.	Els C, Jackson TD, Kunyk D, Lappi VG, Sonnenberg B, Hagtvedt R, Sharma S, Kolahdooz F, Straube S.	Yes	3
Opioid use in non-cancer pain	3	Long-term opioid use in non-cancer pain	Häuser W, Bock F, Engeser P, Tölle T, Willweber-Strumpf A, Petzke F.	No
Opioid use in non-cancer pain		High‐dose opioids for chronic non‐cancer pain: an overview of Cochrane Reviews.	Els C, Jackson TD, Hagtvedt R, Kunyk D, Sonnenberg B, Lappi VG, Straube S.	Yes
Opioid use in non-cancer pain		Adverse events associated with medium‐and long‐term use of opioids for chronic non‐cancer pain: an overview of Cochrane Reviews.	Els C, Jackson TD, Kunyk D, Lappi VG, Sonnenberg B, Hagtvedt R, Sharma S, Kolahdooz F, Straube S.	Yes
Cannabinoids for pain, and symptoms	3 (Allan, Nielsen, Häuser)	Systematic review of systematic reviews for medical cannabinoids: Pain, nausea and vomiting, spasticity, and harms.	Allan GM, Finley CR, Ton J, Perry D, Ramji J, Crawford K, Lindblad AJ, Korownyk C, Kolber MR.	No
Cannabinoids for pain, and symptoms	3	Efficacy, tolerability, and safety of cannabinoids for chemotherapy-induced nausea and vomiting—a systematic review of systematic reviews	Tafelski S, Häuser W, Schäfer M.	No
Cannabinoids for pain, and symptoms		Efficacy, tolerability and safety of cannabis‐based medicines for chronic pain management–An overview of systematic reviews.	Häuser W, Petzke F, Fitzcharles MA.	No
Cannabinoids for pain, and symptoms		Cannabinoid Buccal Spray for Chronic Non-Cancer or Neuropathic Pain: A Review of Clinical Effectiveness, Safety, and Guidelines	Canadian Agency for Drugs and Technologies in Health (CADTH)	No
Cannabinoids for pain, and symptoms		The use of cannabis and cannabinoids in treating symptoms of multiple sclerosis: a systematic review of reviews.	Nielsen S, Germanos R, Weier M, Pollard J, Degenhardt L, Hall W, Buckley N, Farrell M.	No
Manual therapy for the treatment of migraine	2	Complementary and alternative medicine for the prevention and treatment of migraine headache: an overview of systematic reviews.	Posadzki P, AlBedah AM, Khalil MM, AlQaed MS, Lee MS, Ernst E, et al.	No
Manual therapy for the treatment of migraine		Manual Therapeutic Interventions in Headache	Wuttke C, Mangnus E, Kumar S	No
Acute asthma management in children	2	State of the evidence on acute asthma management in children: a critical appraisal of systematic reviews.	Boluyt N, Van der Lee JH, Moyer VA, Brand PL, Offringa M	No
Acute asthma management in children		Principal findings of systematic reviews for chronic treatment in childhood asthma.	Castro-Rodriguez JA, Rodrigo GJ, Rodriguez-Martinez CE	No
Chronic treatment in childhood asthma	2	Safety of regular formoterol or salmeterol in children with asthma: an overview of Cochrane reviews.	Cates CJ, Oleszczuk M, Stovold E, Wieland LS	No
Chronic treatment in childhood asthma		Applicability of evidence from previous systematic reviews on immunotherapy in current practice of childhood asthma treatment: a GRADE (Grading of Recommendations Assessment, Development and Evaluation) systematic review.	van de Griendt EJ, Tuut MK, de Groot H, Brand PL	No
Neuraminidase inhibitors for influenza	2	Safety and effectiveness of neuraminidase inhibitors for influenza treatment, prophylaxis, and outbreak control: a systematic review of systematic reviews and/or meta-analyses	Doll MK, Winters N, Boikos C, Kraicer-Melamed H, Gore G, Quach C	No
Neuraminidase inhibitors for influenza		The value of neuraminidase inhibitors for the prevention and treatment of seasonal influenza: a systematic review of systematic reviews.	Michiels B, Van Puyenbroeck K, Verhoeven V, Vermeire E, Coenen S	No
Lung cancer cost effectiveness analysis	2	Cost-effectiveness of lung cancer screening and treatment methods: a systematic review of systematic reviews. BMC health services research.	Azar FE, Azami-Aghdash S, Pournaghi-Azar F, Mazdaki A, Rezapour A, Ebrahimi P, Yousefzadeh N	No
Lung cancer cost effectiveness analysis		Guideline for the acquisition and preparation of conventional and endobronchial ultrasound-guided transbronchial needle aspiration specimens for the diagnosis and molecular testing of patients with known or suspected lung cancer.	Van Der Heijden EH, Casal RF, Trisolini R, Steinfort DP, Hwangbo B, Nakajima T, Guldhammer-Skov B, Rossi G, Ferretti M, Herth FF, Yung R	No
Lung cancer treatment	2	Postoperative Adjuvant Systemic Therapy in Completely Resected Non–Small-Cell Lung Cancer: A Systematic Review.	Bradbury P, Sivajohanathan D, Chan A, Kulkarni S, Ung Y, Ellis PM	No
Lung cancer treatment		Cochrane systematic reviews of treatments for lung cancer.	Fong KM, Yang IA, Zimmerman PV, Bowman RV	No
Treatment for multiple myeloma	2	Treatment of patients with multiple myeloma: an overview of systematic reviews.	Kumar A, Galeb S, Djulbegovic B.	No
Treatment for multiple myeloma		Efficacy and safety of bortezomib, thalidomide, and lenalidomide in multiple myeloma: an overview of systematic reviews with meta-analyses.	Aguiar PM, de Mendonça Lima T, Colleoni GW, Storpirtis S.	No
Mammography screening	2	World Health Organization position paper on mammography screening.	World Health Organization	No
Mammography screening		Conclusions in systematic reviews of mammography for breast cancer screening and associations with review design and author characteristics.	Raichand S, Dunn AG, Ong MS, Bourgeois FT, Coiera E, Mandl KD.	No
Non-pharmacological treatment for cancer-related fatigue	2	Exercise and cancer-related fatigue in adults: a systematic review of previous systematic reviews with meta-analyses.	Kelley GA, Kelley KS.	No
Non-pharmacological treatment for cancer-related fatigue		What does really help against cancer-related fatigue? An overview of systematic reviews.	Reif K, de Vries U, Petermann F.	No
Acupuncture for palliative care of cancer	3	Effectiveness of acupuncture and related therapies for palliative care of cancer: overview of systematic reviews.	Wu X, Chung VC, Hui EP, Ziea ET, Ng BF, Ho RS, Tsoi KK, Won g SY, Wu JC.	No
Acupuncture for palliative care of cancer		Cochrane systematic reviews examine P6 acupuncture-point stimulation for nausea and vomiting.	Ezzo J, Streitberger K, Schneider A.	No
Acupuncture for palliative care of cancer		What is the evidence for the use of acupuncture as an intervention for symptom management in cancer supportive and palliative care: an integrative overview of reviews.	Towler P, Molassiotis A, Brearley SG.	No
Interventions for improving patient quality of life	2	Review of systematic reviews of non-pharmacological interventions to improve quality of life in cancer survivors.	Duncan M, Moschopoulou E, Herrington E, Deane J, Roylance R, Jones L, Bourke L, Morgan A, Chalder T, Thaha MA, Taylor SC.	No
Interventions for improving patient quality of life		The effectiveness of integrated care interventions in improving patient quality of life (QoL) for patients with chronic conditions. An overview of the systematic review evidence.	Flanagan S, Damery S, Combes G.	No
Hip fracture pre-op management and rehabilitation	2	Hip fracture management, before and beyond surgery and medication: a synthesis of the evidence.	O’Malley, N., Blauth, M., Suhm, N. & Kates, S.	No
Hip fracture pre-op management and rehabilitation		An umbrella review of clinical practice guidelines for the management of patients with hip fractures and a synthesis of recommendations for the pre-operative period.	Filiatreault S, Hodgins M, Witherspoon R.	No
Pharmacologic treatment of low back pain	4	Medications for acute and chronic low back pain: a review of the evidence for an American Pain Society/American College of Physicians clinical practice guideline.	Chou R, Huffman LH.	Yes (Chou 2010)	2
Pharmacologic treatment of low back pain		Pharmacologic management of chronic low back pain: synthesis of the evidence.	White AP, Arnold PM, Norvell DC, Ecker E, Fehlings MG.	No
Pharmacologic treatment of low back pain		A critical review of reviews on the treatment of chronic low back pain.	Furlan, A. D., Clarke, J., Esmail, R., Sinclair, S., Irvin, E. and Bombardier, C.	No
Pharmacological, non-pharmacological, and surgical treatments of low back disorders	4	Low back pain (chronic)	Chou R	Yes (Chou et al 2007)
Pharmacological, non-pharmacological, and surgical treatments of low back disorders		The evidence on surgical interventions for low back disorders, an overview of systematic reviews.	Jacobs WC, Rubinstein SM, Willems PC, Moojen WA, Pellisé F, Oner CF, Peul WC, van Tulder MW.	No
Pharmacological, non-pharmacological, and surgical treatments of low back disorders		Effectiveness of multidisciplinary programmes for clinical pain conditions: An umbrella review.	Dragioti E, Evangelou E, Larsson B, Gerdle B, Medicinska fakulteten, Region Östergötland, et al.	No
Pharmacological, non-pharmacological, and surgical treatments of low back disorders		Systematic reviews of physical and rehabilitation medicine Cochrane contents. Part 1. Disabilities due to spinal disorders and pain syndromes in adults.	Negrini S, Imperio G, Villafane JH, Negrini F, Zaina F. S	No
Surgical treament of low back pain	4	Quality assessment of systematic reviews for surgical treatment of low back pain: an overview.	Martins DE, Astur N, Kanas M, Ferretti M, Lenza M, Wajchenberg M.	No
Surgical treament of low back pain		Artificial Disc Replacement versus Fusion in the Cervical Spine: A Systematic Review of Systematic Reviews	Aneiba KM, Tashani OA. A	No
Surgical treament of low back pain		Outcome of invasive treatment modalities on back pain and sciatica: an evidence-based review.	van Tulder MW, Koes B, Seitsalo S, Malmivaara A.	No
Surgical treament of low back pain		The evidence on surgical interventions for low back disorders, an overview of systematic reviews.	Jacobs WC, Rubinstein SM, Willems PC, Moojen WA, Pellisé F, Oner CF, Peul WC, van Tulder MW.	No
Rotator cuff repair surgery rehabilitation	2	Early Versus Delayed Motion After Rotator Cuff Repair: A Systematic Review of Overlapping Meta-analyses.	Houck DA, Kraeutler MJ, Schuette HB, Mccarty EC, Bravman JT.	No
Rotator cuff repair surgery rehabilitation		Effectiveness of early compared with conservative rehabilitation for patients having rotator cuff repair surgery: an overview of systematic reviews.	Mazuquin BF, Wright AC, Russell S, Monga P, Selfe J, Richards J.	No
Complementary and alternative procedures for fibromyalgia	3	An overview of systematic reviews of complementary and alternative therapies for fibromyalgia using both AMSTAR and ROBIS as quality assessment tools.	Perry R, Leach V, Davies P, Penfold C, Ness A, Churchill R.	No
Complementary and alternative procedures for fibromyalgia		Complementary and alternative procedures for fibromyalgia syndrome: Updated guidelines 2017 and overview of systematic review articles.	Langhorst J, Heldmann P, Henningsen P, Kopke K, Krumbein L, Lucius H, Winkelmann A, Wolf B, Haeuser W.	No
Complementary and alternative procedures for fibromyalgia		An overview of systematic reviews of complementary and alternative medicine for fibromyalgia.	Terry R, Perry R, Ernst E.	No
Pysiotherapy and exercise		Physiotherapy, occupational therapy and physical therapy in fibromyalgia syndrome: Updated guidelines 2017 and overview of systematic review articles	Winkelmann A, Bork H, Brückle W, Dexl C, Heldmann P, Henningsen P, Krumbein L, Pullwitt V, Schiltenwolf M, Häuser W.	No
Pysiotherapy and exercise	3 (Bionde, Thieme)	Exercise for adults with fibromyalgia: an umbrella systematic review with synthesis of best evidence.	Bidonde J, Jean Busch A, Bath B, Milosavljevic S.	No
Therapy for fibromyalgia syndrome	2 (Thieme and Wiffen)	Evidenced-based guidelines on the treatment of fibromyalgia patients: Are they consistent and if not, why not? Have effective psychological treatments been overlooked?.	Thieme K, Mathys M, Turk DC.	No
Therapy for fibromyalgia syndrome		Antiepileptic drugs for neuropathic pain and fibromyalgia‐an overview of Cochrane reviews	Wiffen PJ, Derry S, Moore RA, Aldington D, Cole P, Rice AS, Lunn MP, Hamunen K, Haanpaa M, Kalso EA.	No
Therapy for fibromyalgia syndrome	2 (Sommer and Thieme)	[Drug therapy for fibromyalgia syndrome: Updated guidelines 2017 and overview of systematic review articles]	Sommer C, Alten R, Bär KJ, Bernateck M, Brückle W, Friedel E, Henningsen P, Petzke F, Tölle T, Üçeyler N, Winkelmann A.	No
Cupping	2	Is Cupping an Effective Treatment? An Overview of Systematic Reviews.	Lee MS, Kim J-I, Ernst E.	No
Cupping		An overview of systematic reviews of clinical evidence for cupping therapy.	Cao H, Han M, Zhu X, Liu J.	No
Management of hip and knee osteoarthritis	2 (Zhang and Newberry)	OARSI recommendations for the management of hip and knee osteoarthritis, part I: critical appraisal of existing treatment guidelines and systematic review of current research evidence.	Zhang W, Moskowitz RW, Nuki G, Abramson S, Altman RD, Arden N, Bierma-Zeinstra S, Brandt KD, Croft P, Doherty M, Dougados M.	No
Management of hip and knee osteoarthritis		Treatment of Osteoarthritis of the Knee: An Update Review (Update of "Analgesics for osteoarthritis: an update of the 2006 comparative effectiveness review[2011]")	Newberry SJ, FitzGerald J, SooHoo NF, Booth M, Marks J, Motala A, Apaydin E, Chen C, Raaen L, Shanman R, Shekelle PG	No
Non-pharmacological interventions for osteoarthritis	2 (Zhang and Moe)	Effectiveness of nonpharmacological and nonsurgical interventions for hip osteoarthritis: an umbrella review of high-quality systematic reviews.	Moe RH, Haavardsholm EA, Christie A, Jamtvedt G, Dahm KT, Hagen KB.	No
Non-pharmacological interventions for osteoarthritis		Complementary and alternative medicine for rheumatoid arthritis and osteoarthritis: an overview of systematic reviews.	Ernst E, Posadzki P.	No
Non-pharmacological interventions for osteoarthritis	2 (Ernst and Yang)	Traditional Chinese medicine for knee osteoarthritis: An overview of systematic review.	Yang M, Jiang L, Wang Q, Chen H, Xu G.	No
Knee osteoarthritis - physical therapy	2	Physical therapy interventions for patients with osteoarthritis of the knee: an overview of systematic reviews.	Jamtvedt G, Dahm KT, Christie A, Moe RH, Haavardsholm E, Holm I, Hagen KB.	No
Knee osteoarthritis - physical therapy		Physiotherapy management of lower limb osteoarthritis.	Walsh NE, Pearson J, Healey EL.	No
Rheumatoid arthritis - nonparmacological interventions	2	Effectiveness of nonpharmacological and nonsurgical interventions for patients with rheumatoid arthritis: an overview of systematic reviews	Christie A, Jamtvedt G, Dahm KT, Moe RH, Haavardsholm EA, Hagen KB.	No
Rheumatoid arthritis - nonparmacological interventions		The evidence base for psychological interventions for rheumatoid arthritis: A systematic review of reviews.	Prothero L, Barley E, Galloway J, Georgopoulou S, Sturt J.	No
Rheumatoid arthritis - pharmacological interventions	2	Biologics for rheumatoid arthritis: an overview of Cochrane reviews.	Singh JA, Christensen R, Wells GA, Suarez‐Almazor ME, Buchbinder R, Lopez‐Olivo MA, Ghogomu ET, Tugwell P.	No
Rheumatoid arthritis - pharmacological interventions		Recommendations for the management of rheumatoid arthritis in the Eastern Mediterranean region: an adolopment of the 2015 American College of Rheumatology guidelines	American College of Rheumatology guidelines	No

## Sheet: ICD-10 Med Classifications
All ICD classifications
Certain conditions originating in the perinatal period
Certain infectious and parasitic diseases
Codes for special purposes
Congenital malformations, deformations and chromosomal abnormalities
Diseases of the blood and blood-forming organs and certain disorders involving the immune mechanism
Diseases of the circulatory system
Diseases of the digestive system
Diseases of the ear and mastoid process
Diseases of the eye and adnexa
Diseases of the genitourinary system
Diseases of the musculoskeletal system and connective tissue
Diseases of the nervous system
Diseases of the respiratory system
Diseases of the skin and subcutaneous tissue
Endocrine, nutritional and metabolic diseases
External causes of morbidity and mortality
Factors influencing health status and contact with health services
Injury, poisoning and certain other consequences of external causes
Mental and behavioural disorders
Neoplasms
Pregnancy, childbirth and the puerperium
Symptoms, signs and abnormal clinical and laboratory findings, not elsewhere classified
